# Supplementary material for: GRAINet: Mapping grain size distributions in river beds from UAVimages with convolutional neural networks
Source: Copernicus journal article supplement (doi:10.5194/hess-2020-196), 2020-05-25
Supplement: Supplementary file [file hess-2020-196-RC2-supplement.pdf]

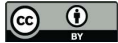

# GRAINet: Mapping grain size distributions in river beds from UAV images with convolutional neural networks

Nico Lang<sup>1</sup>, Andrea Irniger<sup>2</sup>, Agnieszka Rozniak<sup>1</sup>, Roni Hunziker<sup>2</sup>, Jan Dirk Wegner<sup>1</sup>, and Konrad Schindler<sup>1</sup>

<sup>1</sup>EcoVision Lab, Photogrammetry and Remote Sensing, ETH Zürich, Switzerland

<sup>2</sup>Hunziker, Zarn & Partner, Aarau, Switzerland

**Correspondence:** Nico Lang (nico.lang@geod.baug.ethz.ch)

**Abstract.** Grain size analysis is the key to understand the sediment dynamics of river systems. We propose *GRAINet*, a data-driven approach to analyze grain size distributions of entire gravel bars based on georeferenced UAV images. A convolutional neural network is trained to regress grain size distributions as well as the characteristic mean diameter from raw images. *GRAINet* allows the holistic analysis of entire gravel bars, resulting in (i) high-resolution maps of the spatial grain size distribution at large scale, and (ii) robust grading curves for entire gravel bars. To collect a large training dataset of 1,  samples, we introduce *digital line sampling* as a new annotation strategy, following the widely applied line sampling analysis of Fehr (1987). Our evaluation on 25 gravel bars along 6 different rivers in Switzerland yields high accuracy: The resulting maps of mean diameters have a mean absolute error (M  of 1.1 cm, with no bias. Robust grading curves for entire gravel bars can be extracted if representative training data is available. At the gravel bar level the MAE of the predicted mean diameter is even reduced to 0.3 cm. Extensive experiments were carried out to study the quality of the digital line samples, the generalization capability of *GRAINet* to new locations, the model performance w.r.t. human labeling noise, the limitations of the current model, and the potential of *GRAINet* to analyze images with low resolutions.

## 1 Introduction

Understanding the hydrological and geomorphological processes of rivers is crucial for their sustainable development, so as to mitigate the risk of extreme flood events and to preserve the biodiversity in aquatic habitats. However, the fluvial morphology of many streams is heavily affected by human activity and construction along the river. Gravel extractions, sediment retention basins in the upper catchments, hydro power plants, dams or channels reduce the bed load and lead to surface armouring, clogging of the bed, and latent erosion (Surian and Rinaldi, 2003; Simon and Rinaldi, 2006; Poepl et al., 2017; Gregory, 2019). As a consequence, the natural alteration of the river bed is hindered, eventually deteriorating habitats and potential spawning grounds. Moreover, the process of bedload transport can cause bed or bank erosion, the destruction of engineering

# Summary of Comments on hess-2020-196.pdf

---

Page: 1

---

 Number: 1      Author: patca      Subject: Sticky Note      Date: 17/07/2020 14:11:55  
remove the word 'large'. In the context of deep learning, 1400 samples is not large.

---

 Number: 2      Author: patca      Subject: Sticky Note      Date: 17/07/2020 14:12:44  
no size dependence on MAE?

---

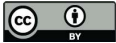

structures (e.g., due to bridge scours) or increased flooding due to deposits in the channel that amplify the impact of severe floods (Badoux et al., 2014).

25 What makes modelling of fluvial morphology challenging are the mutual dependences between the flow field, grain size, its movement and the geometry of the channel bed and banks. While channel shape and roughness define the flow field, the flow moves sediments — depending on their size — and the bed is altered by erosion and deposition. This mutually reinforcing system makes understanding channel form and process hard. Transport calculations in numerical models are thus still based on empirical formulas (Nelson et al., 2016).

30 One important key indicator for modelling sediment dynamics of a river system is the *grading curve* of the sediment. Depending on the complexity of the model, the grain size distribution is either described by its characteristic diameters (e.g., the mean diameter  $d_m$  defined by Meyer-Peter and Müller, 1948) or by the fractions of the grading curve (fractional transport, Habersack et al., 2011). The grain size of the river bed is crucial because it defines the roughness of the channel as well as the incipient motion of the sediment. Thus, knowledge of the grain size distribution is essential to specify flood protection measures, to assess bed stability, to classify aquatic habitats, and to evaluate geological deposits (Habersack et al., 2011).  
35 Collecting the required calibration data to describe the composition of a river bed is time-consuming and costly, since it varies strongly along the downstream of a river (Surian, 2002) and even locally within individual gravel bars (Babej et al., 2016).

Traditional mechanical sieving to classify sediments (Krumbein et al., 1938) requires a substantial amount of skilled labour, and the whole process of digging, transport, and sieving is time-consuming, costly, and destructive. Consequently, it is rarely implemented in practice. A simplified, more efficient approach that collects sparse data samples in the field is the *line sampling* analysis of Fehr (1987), the quasi-gold standard in practice today.<sup>1</sup> Yet, this approach is still very time-consuming and, worse, potentially inaccurate and subjective (Detert and Weitbrecht, 2012). Moreover, data collection requires physical access and cannot adequately sample inaccessible parts of the bed, such as gravel bar islands.  1

An obvious idea to accelerate data acquisition is to estimate grain size distribution from images. So-called *photo-sieving* methods that manually measure gravel sizes from ground level images (Adams, 1979; Ibbeken and Schleyer, 1986) were first proposed in the late 1970s. Much research tried to automatically estimate grain size distributions from ground level images  
45 (Butler et al., 2001; Rubin, 2004; Graham et al., 2005; Verdú et al., 2005; Detert and Weitbrecht, 2012; Buscombe, 2013;  2  
Blažek et al., 2014; Spada et al., 2018; Buscombe, 2019). On the contrary, relatively little research has addressed mapping of grain sizes from images at larger scale (Carbonneau et al., 2004, 2005, 2018; Zettler-Mann and Fonstad,  3  
2020), needed for practical impact.

50 Other researchers have proposed to analyze 3D-data acquired with terrestrial or airborne LiDAR, or through photogrammetric stereo matching (Brasington et al., 2012; Vázquez-Tarrío et al., 2017; Wu et al., 2018; Huang et al., 2018). However, working with 3D-data introduces much more overhead in data processing compared to 2D-imagery. Moreover, terrestrial data acquisition lacks flexibility and scalability, while airborne LiDAR remains costly (at least until it can be recorded with consumer-grade UAVs). Photogrammetric 3D-reconstruction may be limited by the ground sampling distance of the images,  
55 leading to the absence of smaller grain  4

<sup>1</sup>To the best of our knowledge, this includes at least the German-speaking countries: Switzerland, Germany, and Austria.

## Page: 2

- 
- Number: 1 Author: patca Subject: Sticky Note Date: 17/07/2020 14:26:02  
There is too much tendency for short paragraphs. Tighten this up.
- 
- Number: 2 Author: patca Subject: Sticky Note Date: 17/07/2020 14:26:16  
Black et al was airborne work, should be in the next set
- 
- Number: 3 Author: patca Subject: Sticky Note Date: 17/07/2020 14:27:28  
Missing paper by Woodget and Austrums, DeHaas et al (debris fans using UAV granulometry). Dugdale et al on Aerial Photosieving as well
- 
- Number: 4 Author: patca Subject: Sticky Note Date: 17/07/2020 14:29:30  
I see your point but this does not seem accurate. The image ground sampling distance will also have an effect on any image-based DL method. But in SfM, the final resolution of the point cloud is never as high as the imagery. Classically, we'd assume the DEM needs at least 2x2 image pixels, but with SfM clouds, this relationship is not so universal.

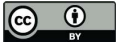

While automatic grain size estimation from ground-level images is more efficient than traditional field measurements (Wolman, 1954; Fehr, 1987), scaling to large regions is hard. Threshold-based image analysis for explicit gravel detection and measurements is affected by lighting variations and thus requires much manual parameter tuning. In contrast, statistical approaches avoid explicit detection of grains and empirically correlate image content with the grain size measurement. Although these data-driven approaches are promising, their predictive accuracy and generalization to new scenes (e.g., airborne imagery at country-scale) is currently limited by hand-designed features and small training datasets.

In this paper, we propose a novel approach based on convolutional neural networks (CNN) that efficiently maps grain size distributions over entire gravel bars, using georeferenced and orthorectified images acquired with a low-cost UAV. Since it is hard to collect sufficiently large amounts of labeled training data for hydrological tasks (Shen et al., 2018), we introduce *digital line sampling* as a new, efficient annotation strategy. Our CNN avoids explicit detection of individual objects (grains) and predicts the grain size distribution or derived variables directly from the raw images. This strategy is robust against partial object occlusions and allows for accurate predictions even with coarse image resolution, where the individual small grains are not visible by the naked eye. A common characteristic of most research in this domain is that grain size is estimated in pixels (Carbonneau et al., 2018). Typically, the image scale is determined by recording a scale bar in each image, which is used to convert the grain size into metric units (e.g., Detert and Weitbrecht, 2012), but limits large-scale application. In contrast, our approach estimates grain sizes directly in metric units from orthorectified and georeferenced UAV images.

We evaluate the performance of our method and its robustness to new, unseen locations and different imaging conditions (e.g., weather, lighting, shadows) through cross-validation on a set of 25 gravel bars. Like Shen et al. (2018), we see great potential of deep learning techniques in hydrology and hope that our research constitutes a further step towards its widespread adoption.

## 2 Related Work

In this section, we review related work on automated grain size estimation from images. We refer the reader to Piégay et al. (2019) for a comprehensive overview of remote sensing approaches on rivers and fluvial geomorphology. Previous research can be classified into *traditional image processing* and *statistical approaches*.

*Traditional image processing*, also referred to as object-based approaches (e.g. Carbonneau et al., 2018), has been applied to segment individual grains and measure their sizes, by fitting an ellipse and reporting the length of its minor axis as the grain size (Butler et al., 2001; Sime and Ferguson, 2003; Graham et al., 2005, 2010; Detert and Weitbrecht, 2012). Detert and Weitbrecht (2012) presented *BASEGRAIN*, a MATLAB-based object detection software tool for granulometric analysis of ground-level, top-view photographs of fluvial, non-cohesive gravel beds. The gravel segmentation process includes gray-scale thresholding, edge detection, and a watershed transformation. Despite this automated image analysis, extensive manual parameter tuning is often necessary, which hinders the automatic application to large and diverse sets of images.

*Statistical approaches* aim to overcome limitations of object-centered approaches by relying on global image statistics. Image texture (Carbonneau et al., 2004; Verdú et al., 2005), auto-correlation (Rubin, 2004; Buscombe and Masselink, 2009),

## Page: 3

---

 Number: 1      Author: patca      Subject: Sticky Note      Date: 17/07/2020 14:31:29  
Has this been demonstrated in the paper?

---

 Number: 2      Author: patca      Subject: Sticky Note      Date: 17/07/2020 14:34:00  
Need to add PebbleCounts by Puriton and Bookhagen, in this journal.



wavelet-transformations (Buscombe, 2013), or 2D spectral decomposition (Buscombe et al., 2010) are used to estimate the  
90 characteristic grain sizes like the mean ( $d_m$ ) and median ( $d_{50}$ ) grain diameters. Alternatively, one can regress specific per-  
centiles of the grading curve individually (Black et al., 2014; Buscombe, 2013, 2019).

Buscombe (2019) proposed a framework called SediNet, based on CNNs, to estimate grain sizes as well as shapes from  
images. Overall, the used dataset of 409 manually labeled sediment images was halved into training and test portions, and  
CNNs were trained from scratch, despite the small amount of data.<sup>2</sup>

95 In contrast to previous work, we view the frequency or volume distribution of grain sizes as a probability distribution (of  
sampling a certain size), and fit our model by minimising the discrepancy between the predicted and ground truth distributions.  
Our method is inspired by Sharma et al. (2020) who proposed HistoNet to count objects in images (soldier fly larvae and cancer  
cells) and to predict absolute size distributions of these objects directly, without any explicit object detection. The authors show  
that end-to-end estimation of object size distributions outperforms baselines using explicit object segmentation (in their case  
100 with Mask-RCNN, He et al., 2017). Even though Sharma et al. (2020) avoid explicit instance segmentation, the training process  
is supervised with a so-called count map derived from a pixel-accurate object mask, which indicates object sizes and locations  
in the image. In contrast, our approach requires neither a pixel-accurate object mask nor a count map for training, which are  
both laborious to annotate manually. Instead, the CNN is trained by simply regressing the grain size distribution end-to-end.  
Labelling of new training data becomes much more efficient, because we no longer need to acquire pixel-accurate object labels.  
105 Our model learns to estimate object size frequencies by looking at large image patches, without access to explicit object counts  
or locations.

### 3 Data

We collected a dataset of 1,491 digitised line samples acquired from a total of 25 different gravel bars on six Swiss rivers (see  
Table B1 in the Appendix for further details). We name gravel bar locations with the river name and the distance from the  
110 river mouth in kilometers.<sup>3</sup> All gravel bars are located on the northern side of the Alps, except for two sites at the river Rhone  
(Fig. 1). All investigated rivers are gravel rivers with gradients of 0.01-1.5%, with the majority (20 sites) having gradients  
<1.0%. The river width at the investigated sites varies between 50m and 110m, whereby *Emme km 005.5* and *Emme km 006.5*  
correspond to the narrowest sites and *Reuss km 017.2* represents the widest one.

One example image tile from each of the 25 sites is shown in Fig. 2. This collection qualitatively highlights the great variety  
115 of grain sizes, distributions, and lighting conditions (e.g., shadows, hard and soft light due to different weather conditions).  
The total amount of digital line samples collected per site varies between 4 (*Reuss km 021.4*) und 212 (*Kl. Emme km 030.3*),  
depending on the spatial extent and the variability of grain sizes within the gravel bar.

<sup>2</sup>While not clearly explained in the article, the results suffer from overfitting, due to a flaw in the experimental setup. Our review of the published  
source code revealed that the stopping criterion for the training uses the test data, leading to overly optimistic numbers.

<sup>3</sup>With the exception of location *Emme* - , a gravel pile outside the channel.

---

 Number: 1      Author: patca      Subject: Sticky Note      Date: 17/07/2020 14:35:28  
So the results need to be changed for the publication?



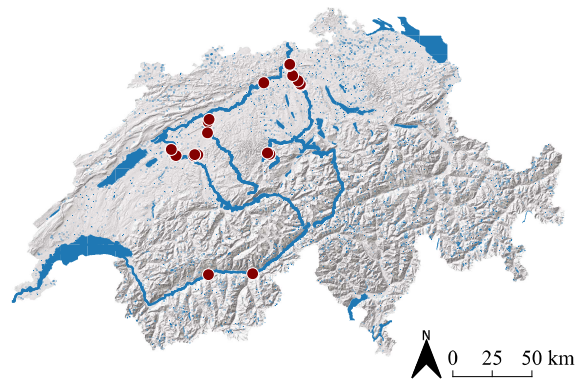

**Figure 1.** Overview map with the 25 ground truth locations of the investigated gravel bars in Switzerland.

### 3.1 UAV imagery

We acquired images with an off-the-shelf consumer UAV, namely the DJI PHANTOM 4 PRO. Its camera has a 20 Mega-pixel  
120 CMOS sensor ( $5472 \times 3648$  pixels) and a nominal focal length of 24 mm (35 mm format equivalent).<sup>4</sup> Flight missions were  
planned using the flight planner Pix4D capture.<sup>5</sup> Adjacent images have an overlap of 80%. To achieve a ground sampling  
distance of  $\approx 0.25$  cm, the flying height was set to 10 m above the gravel bar. This pixel resolution allows the human annotator  
to identify individual grains as small as 1 cm. Furthermore, to avoid motion blur in the images, the drone was flown at low  
speed. We generated georeferenced orthophotos with AgiSoft Photoscan Professional.<sup>6</sup>

125 The accuracy of the image scale has a direct effect on the grain size measurement from georeferenced images (Carbonneau  
et al., 2018). To assure that our digital line samples are not affected by image scale errors, we compare them with corre-  
sponding line samples in the field and observe good agreement. Note that absolute georeferencing is not crucial for this study.  
Because ground truth is directly derived from the orthorectified images, potential absolute georeferencing errors do not affect  
the processing.

### 130 3.2 Annotation strategy

We introduce a new annotation strategy (Fig. 3), called *digital line sampling*, to label grain sizes in orthorectified images. To  
allow for a quick adoption of our proposed approach, we closely follow the popular *line sampling* field method introduced  
originally by Fehr (1987). Instead of measuring grains in the field, we carry out measurements in images. First, orthorectified  
images are tiled into rectangular image patches with a fixed size of  $1.25 \text{ m} \times 0.5 \text{ m}$ . We align the major axis with the major  
135 river flow, either north-south or east-west. A human annotator manually draws polygons of 100–150 grains along the center

<sup>4</sup>dji.com/ch/phantom-4-pro (2020-03-23)

<sup>5</sup>pix4d.com (2020-04-04)

<sup>6</sup>agisoft.com (2020-04-04)

Are you really using the old Photoscan and have you not updated the software in the last 2 years? You are not using Metashape?

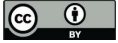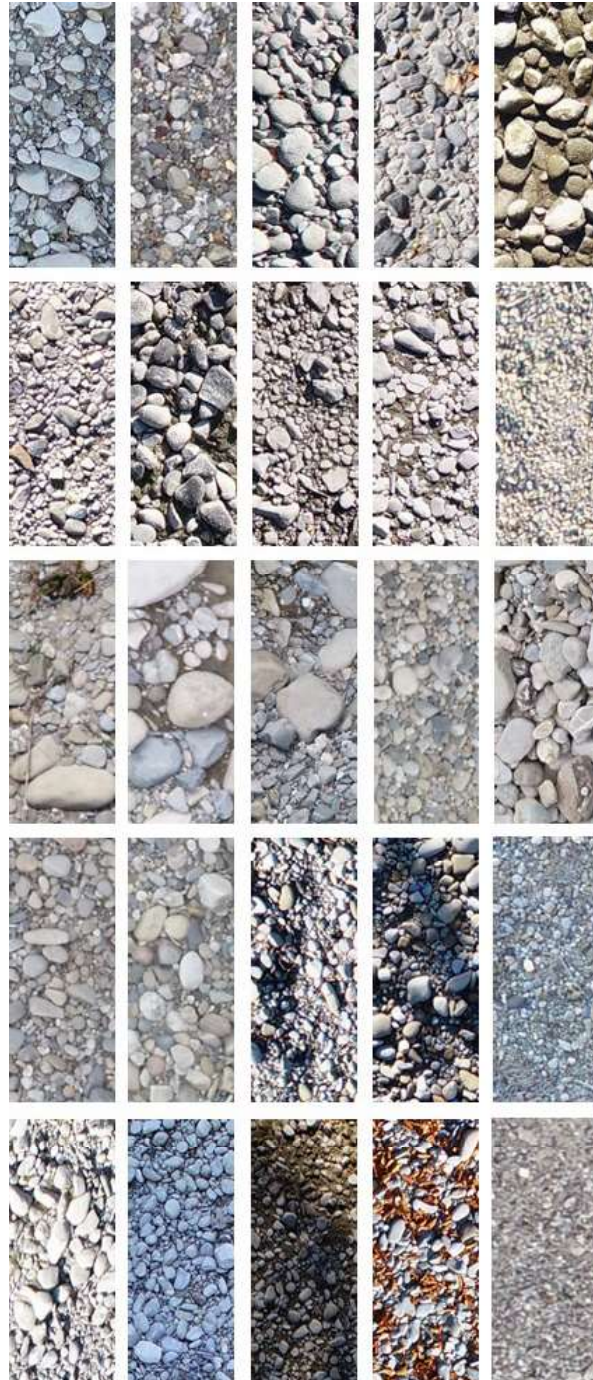

**Figure 2.** Example image tiles (1.25 m × 0.5 m) with 0.25 cm ground sampling distance. Each of the 25 example tiles is taken from a different gravel bar.

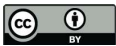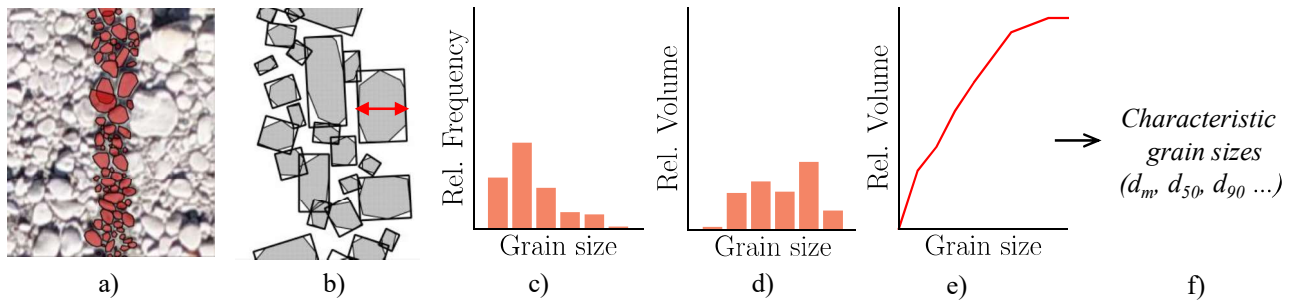

**Figure 3.** Overview of the line sampling procedure. (a) Digital line sample with 100–150 grains, (b) Automatic extraction of the b-axis, (c) Relative *frequency* distribution of grain sizes, (d) Relative *volume* distribution, (e) Grading curve, (f) Characteristic grain sizes (e.g.  $d_m$ )

line of a tile (Fig. 3 a) which takes 10-15 minutes per sample on average. We asked annotators to imagine the outline of partially occluded grains if justifiable. Afterwards, the minor axis of all annotated grains is measured by automatically fitting a minimum bounding rectangle around the polygons (Fig. 3 b). Grain sizes are quantized into 21 bins as shown in Fig. 4, which leads to a relative frequency distribution of grain sizes (Fig. 3 c). Line samples are first converted to a quasi-sieve throughput (Fig. 3 d) by weighting each bin with the weight  $w_b = d_{mb}^\alpha$  (Fehr, 1987), where  $d_{mb}$  is the mean diameter per bin and  $\alpha$  is set to 2 (assuming no surface armouring). Usually undersampled finer fractions are predicted by a Fuller distribution, which results in the final *grading curve* (Fig. 3 e). This grading curve can either be directly used for fractional bed load simulations, or to derive characteristic grain sizes corresponding to the percentiles of the grading curve (Fig. 3 f). These are needed, for instance, to calculate the single grain bed load transport capacity ( $d_{50}$ ,  $d_{65}$ ,  $d_m$ ), to determine the flow resistance ( $d_m$ ,  $d_{90}$ ), and to describe the degree of surface armouring ( $d_{30}$ ,  $d_{90}$ ; Habersack et al., 2011).

Our annotation strategy has several advantages. First, digital line sampling is the one-to-one counterpart of the current state-of-the-art in the digital domain. Second, the labelling process is more convenient, as it can be carried out remotely and with arbitrary breaks. Third, image-based line sampling is repeatable and reproducible. Multiple experts can label the exact same location, which makes it possible to compute standard deviations and quantify the uncertainty of the ground truth. Finally, *digital line sampling* allows one to collect vast amount of training data, which is crucial for the performance of CNNs. For modern machine learning techniques, data quantity is often more important than quality, as shown for example in Van Horn et al. (2015).

### 3.3 Ground truth

In total, >180,000 grains over a wide range of sizes have been labeled manually (Fig. 4). Individual grain sizes range from 0.5 cm to approx. 40 cm. The major mode of individual grain sizes is between 1 and 2 cm and the minor mode between 4 and 6 cm. Mean diameters  $d_m$  per site vary between 1.3 cm (Aare km 178.0) and 29.3 cm (Gr. Entle km 002.0) with a global mean of all 1,491 annotated line samples at 6.2 cm and a global median at 5.3 cm. The distribution of the mean diameters  $d_m$

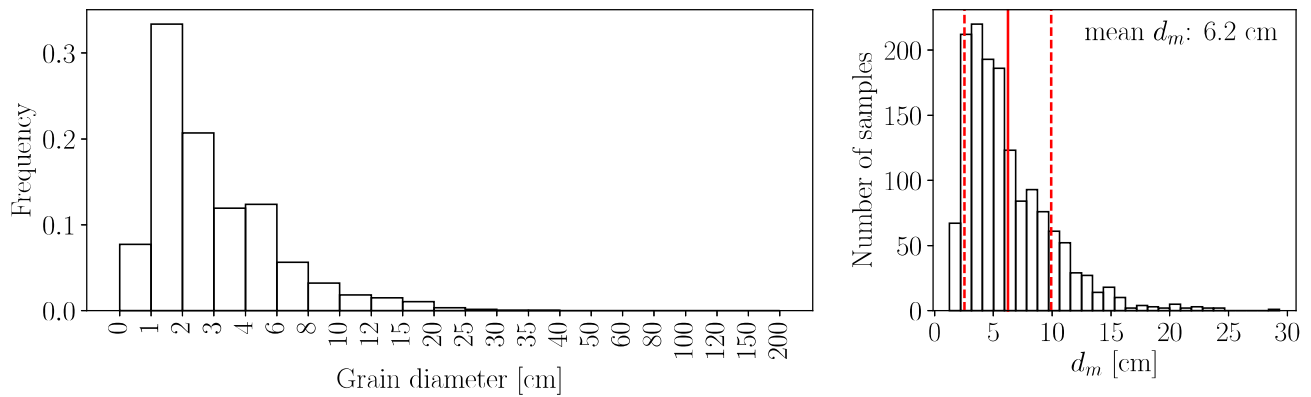

**Figure 4.** Overview of the ground truth data. Left: Average of the 1,491 relative frequency distributions, Right: Histogram of the respective characteristic mean diameter  $d_m$ . The solid red line corresponds to the mean  $d_m$  and the dashed red lines to mean  $\pm$  std.

(Fig. 4, right) follows a bi-modal distribution as well. The major mode is around 4 cm and the minor mode around 8 cm. We treat all samples the same and do not further distinguish between shapes when training our CNN model for estimating the size distribution, such that the learned model is universal and applicable to all types of gravel bars. Furthermore, to train a robust CNN, we not only collect easy (clean) samples, but also challenging cases with natural disturbances such as grass, leaves, moss, mud, water, and ice.

## 4 Method

Many hydrological parameters are continuous by nature and can be estimated via regression. Neural networks are generic machine learning algorithms that can perform both classification and regression. In the following, we discuss details of our methodology for regressing grain size distributions of entire gravel bars from UAV images.

### 4.1 Image preprocessing

Before feeding image tiles to the CNN, we apply a few standard pre-processing steps. To simplify the implicit encoding of the metric scale into the CNN output, the ground sampling distance (GSD) of the image tiles is unified to 0.25 cm. The expected resolution of a 1.25 m x 0.5 m tile after the resampling is  $500 \times 200$  pixels. Inaccuracies may arise due to rounding effects from the prior cropping. For simplicity the tile size is cropped to  $500 \times 200$  pixels. Additionally, horizontal tiles are flipped to be vertical.

Finally, following best practice for neural networks, we normalize the intensities of the RGB channels to be standard normal distributed with mean 0 and standard deviation 1, which leads to faster convergence of gradient-based optimization (LeCun et al., 2012). It is important to note that any statistics used for pre-processing must be computed solely from the training data, and then applied unaltered to the training, validation, and test sets.

---

Number: 1      Author: patca      Subject: Sticky Note      Date: 17/07/2020 14:40:51

---

In practice, I have seen more work that merely divides the bands by 255 in order to simply convert to a 0-1 range. This is much easier when applying to other data as you do not need to carry across the fit to adjust the std. Can the authors provide more citations that this is best practice?



## 4.2 Regression of grain size distributions with GRAINet

Our CNN architecture, which we call *GRAINet*, regresses grain size distributions and their characteristic grain sizes directly from UAV imagery. CNNs are generic machine learning algorithms that learn to extract texture and spectral features from raw images to solve a specific image interpretation task. A CNN consists of several convolutional (CONV) layers that apply a set of linear image filter-kernels to their input. Each filter transforms the input into a feature map by discrete convolution, i.e., the output is the scalar product between the filter values and a sliding window of the inputs. After this linear operation, non-linear *activation functions* are applied element-wise to yield powerful non-linear models. The resulting *activation maps* are forwarded as input to the next layer. In contrast to traditional image processing, the parameters of filter kernels (*weights*) are learned from training data. Each filter kernel ranges over all input channels and has a size of  $w \times w \times d_{in}$ , where  $w$  defines the kernel width. While a kernel width of 3 is the minimum width required to learn textural features,  $1 \times 1$  filters are also useful to learn the linear combination of activations from the preceding layer.

A popular technique to improve convergence is *batch normalization* (Ioffe and Szegedy, 2015), i.e., re-normalizing the responses within a batch after every layer. Besides better gradient propagation, this also amplifies the non-linearity (e.g. in combination with the standard ReLU activation function).

Our proposed *GRAINet* is based on state-of-the-art residual blocks introduced by He et al. (2016). Every residual block transforms its input using three convolutional layers, each including a batch normalization and a ReLU activation. The first and last convolutional layers consist of  $1 \times 1 \times d_{in}$  filters (CONV  $1 \times 1$ ) while the second layer has  $3 \times 3 \times d_{in}$  filters (CONV  $3 \times 3$ ). Beside this series of transformations the input signal is also forwarded through a shortcut, a so called *residual connection* and added to the output of the residual block. This shortcut allows the training signal to propagate better through the network. Every second block has a step size (*stride*) of 2, so as to gradually reduce the spatial resolution of the input image and thereby increase the *receptive field* of the network.

We tested different network depths (i.e. number of blocks / layers) and found the following architecture to work best: *GRAINet* consists of a single  $3 \times 3$  "entry" CONV layer followed by six residual blocks and a  $1 \times 1$  CONV layer that generates  $B$  final activation maps. These activation maps are reduced to a one-dimensional vector of length  $B$  using global average pooling, which computes the average value per activation map. If the final target output is a scalar (i.e. a characteristic grain size like the  $d_m$ )  $B$  is set to 1. To predict a full grain size distribution,  $B$  equals the number of bins of the discretized distribution. Finally, the vector is passed through a softmax activation function to obtain a (pseudo) probability, as we are interested in a relative distribution.<sup>7</sup> The total number of parameters of this network architecture is 1.6 million, which is rather lean compared to modern image analysis networks that often have  $>20$  million parameters.

<sup>7</sup>In contrast to Sharma et al. (2020) we estimate relative instead of absolute distributions. While they show that the  $L^1$ -loss and the KL-divergence can be combined to capture scale and shape of the distribution, respectively, we simply fix the scale of the predicted distribution with a softmax before the output.

## Page: 9

- 
- Number: 1 Author: patca Subject: Sticky Note Date: 17/07/2020 14:41:33  
strictly speaking, the convolution operation is a dot product, not a scalar product.
- 
- Number: 2 Author: patca Subject: Sticky Note Date: 17/07/2020 14:43:29  
In a paper on grain size, can you please avoid using d or D for parameters other than particle dimensions?
- 
- Number: 3 Author: patca Subject: Sticky Note Date: 17/07/2020 14:45:36  
An you please give an example. Readers amiliar with DL will associate the softmax activation with a classification output where you use the argmax function to determine the final class. Why not just pass a linear activation function with the same number of nodes as samples in the distribution (eg 3 nodes for D16, D50, D84) ?
- 
- Number: 4 Author: patca Subject: Sticky Note Date: 17/07/2020 14:46:18  
But still very large compared to your sample size. Given the footnote above about overfitting, I would be cautious.
- 
- Number: 5 Author: patca Subject: Sticky Note Date: 17/07/2020 14:47:10  
Nee a figure for network architecture. Pulbished code is mentionned, where is it published?



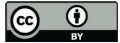

#### 4.2.1 CNN output targets

As CNNs are modular learning machines, the same CNN architecture can be used to predict different outputs. As already described, we can predict either discrete (relative) distributions, or scalars such as a characteristic grain size. We thus train *GRAINet* to directly predict the outputs proposed by Fehr (1987) at intermediate steps (Fig. 3):

- 210 (i) relative frequency distribution (*frequency*)
- (ii) relative volume distribution (*volume*)
- (iii) characteristic mean diameter ( $d_m$ ).

#### 4.2.2 Model learning

Depending on the target type (probability distribution or scalar), we choose a suitable *loss* function (i.e., error metric; Sect. 4.3) that is minimized by iteratively updating the trainable network parameters. We initialize network weights randomly and optimize with standard mini-batch stochastic gradient descent (SGD). During each *forward pass* the CNN is applied to a *batch* (subset) of the training samples. Based on these predictions, the difference to ground truth is computed with the loss function, which provides the supervision signal. To know in which direction the weights should be updated, the partial derivative of the loss function is computed w.r.t. every weight in the network. By applying the chain rule for derivatives, this gradient is  
220 *back-propagated* through the network from the prediction to the input (*backward pass*). The weights are updated with small steps in negative gradient direction. A hyper-parameter called the *learning rate* controls the step size. In the training process, this procedure is repeated iteratively, drawing random batches from the training data. One training *epoch* is finished once all samples of the training dataset have been fed to the model (at least) once.

We use the ADAM optimizer (Kingma and Ba, 2014) for training, which is a popular adaptive version of standard SGD.  
225 ADAM adaptively attenuates high gradients and amplifies low gradients by normalizing the global learning rate with a running average for each trainable parameter. Note that SGD acts as a strong regularizer, as the small batches only roughly approximate the true gradient over the full training dataset. This allows training neural networks with millions of parameters.

To enhance the diversity of the training data, many techniques for image data augmentation have been proposed, which simulate natural variations of the data. We employ randomly horizontal and vertical flipping of the input images. This makes  
230 the model more robust and, in particular, avoids overfitting to certain sun angles with their associated shadow directions.

#### 4.3 Loss functions and error metrics

Various error metrics exist to compare ground truth distributions to predicted distributions. Here, we focus on three popular and intuitive metrics that perform best for our task: the Earth mover's distance (short EMD; also known as the Wasserstein metric), the Kullback-Leibler divergence (KLD), and the Intersection over Union (IoU; also known as the Jaccard index).

235 The Earth mover's distance (Eq. 1) views two probability density functions (PDF)  $p$  and  $q$  as two piles of earth with different shapes and describes the minimum amount of "work" that is required to turn one pile into the other. This "work" is measured

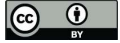

as the amount of moved earth (probability mass) multiplied by its transported distance. In the one-dimensional case, the Earth mover's distance can be implemented as the integral of absolute error between the two respective cumulative density functions (CDF)  $P$  and  $Q$  of the distributions (Ramdas et al., 2017). Furthermore, for discrete distributions, the integral simplifies to a sum over  $B$  bins.

$$\text{EMD}(P, Q) = \sum_{b=1}^B |P(b) - Q(b)| \quad (1)$$

Alternatively, the Kullback-Leibler divergence (Eq. 2) is widely used in machine learning because minimizing the forward KLD is equivalent to minimizing the negative likelihood or the cross-entropy (up to a constant). It should be noted though that Kullback-Leibler divergence is not symmetric. For a supervised approach the forward KLD is used, where  $p$  denotes the true distribution and  $q$  the predicted distribution. This error metric only accounts for errors in the bins that actually contain a ground truth probability mass  $p(b) > 0$ . Errors in empty ground truth bins do not contribute to the forward KLD. Therefore, optimizing the forward KLD has a mean-preserving behaviour. In contrast, the reverse KLD is mode-preserving. Note that the KLD only accounts for errors in bins containing ground truth probability mass. Thus, the overestimation of empty bins does not directly contribute to the error metric, but as we treat the grain size distribution as a probability distribution, this displaced probability mass is missing in the bins that are taken into account.<sup>8</sup>

$$D_{\text{KL}}(p \parallel q) = \sum_{b=1}^B p(b) \log \left( \frac{p(b)}{q(b)} \right) \quad (2)$$

In contrast to the EMD and KLD, the Intersection over Union (Eq. 3) is an intuitive error metric that is maximized and ranges between 0 and 1. While it is often used in object detection or semantic segmentation tasks, it allows to compare two 1D-probability distributions as follows:

$$\text{IoU}(p, q) = \frac{\sum_{b=1}^B \min(p(b), q(b))}{\sum_{b=1}^B \max(p(b), q(b))}. \quad (3)$$

During the training process the loss function (Eq. 4) simply averages the respective error metric over all samples within a training batch. To evaluate performance, we average the error over the unseen test dataset:

$$\mathcal{L} = \frac{1}{N} \sum_{i=1}^N D(y_i, f(x_i)), \quad (4)$$

where  $D$  corresponds to the error metric,  $f$  denotes the CNN model,  $N$  the number of samples,  $x_i$  the input image tile,  $y_i$  the ground truth PDF or CDF, and  $f(x_i)$  the predicted distribution, respectively.

To optimize and evaluate CNN variants that directly predict scalar values (like for example GRAINet, which directly predicts the mean diameter  $d_m$ ) we investigate two loss functions: the mean absolute error (MAE, also known as  $L^1$ -loss, Eq. 5), and the mean squared error (MSE, also known as  $L^2$ -loss, Eq. 6).

$$\text{MAE} = \frac{1}{N} \sum_{i=1}^N |f(x_i) - y_i| \quad (5)$$

<sup>8</sup>For completeness, we note that there is a smoothed and symmetric (but less popular) variant of the KLD, the Jensen-Shannon divergence.



265

$$\text{MSE} = \frac{1}{N} \sum_{i=1}^N (f(x_i) - y_i)^2. \quad (6)$$

Furthermore, we evaluate the model bias with the mean error (ME):

$$\text{ME} = \frac{1}{N} \sum_{i=1}^N f(x_i) - y_i, \quad (7)$$

where a positive mean error indicates that the prediction is greater than the ground truth  <sup>1</sup>

#### 270 4.4 Evaluation strategy

The trained *GRAINet* is quantitatively and qualitatively evaluated on a holdout test set, i.e., a portion of the dataset that was not seen during training. We analyze error cases and identify limitations of the proposed approach. Finally, with our image-based annotation strategy multiple experts can label the same sample, which we exploit to relate the model performance to the variation between human expert annotations.

##### 275 4.4.1 Ten-fold cross-validation

To avoid any train-test split bias, we randomly shuffle the full dataset and create 10 disjoint subsets, such that each sample is contained only in a single subset. Each of these subsets is used once as the hold-out test set, while the remaining 9 subsets are used for training *GRAINet*. The validation set is created by randomly holding out 10% of the training data, and used to monitor model performance during training and to tune hyper-parameters. Results on all 10 folds are combined to report overall model performance.

##### 4.4.2 Geographical cross-validation

Whether or not a model is useful in practice strongly depends on its capability to generalize across a wide range of scenes unseen during training. Modern CNNs have millions of parameters and in combination with their non-linear properties, these models have high capacity. Thus, if not properly regularized or if trained on a too small dataset, CNNs can potentially memorize spurious correlations specific to the training locations which would result in poor generalization to unseen data. We are particularly interested if the proposed approach can be applied to a new (unseen) gravel bar. In order to validate if *GRAINet* can generalize to unseen river beds we perform geographical cross-validation. All images of a specific gravel bar are held out in turn and used to test the model trained on the remaining sites  <sup>2</sup>

##### 4.4.3 Comparison to human performance

290 The predictive accuracy of machine learning models depend on the quality of the labels used for training. In fact, label noise that would lead to inferior performance of the model is introduced partially by the labeling method itself. Grain annotation in

## Page: 12

---

Number: 1 Author: patca Subject: Sticky Note Date: 17/07/2020 14:50:40

This is all excellent, but the reader needs to see some evidence that the network is not overfit. Simple plots of training loss and accuracy vs epoch along with validation loss and accuracy vs epochs would help.

---

Number: 2 Author: patca Subject: Sticky Note Date: 17/07/2020 14:51:38

This is boot strapping. Would be much better to hold out entire rivers.

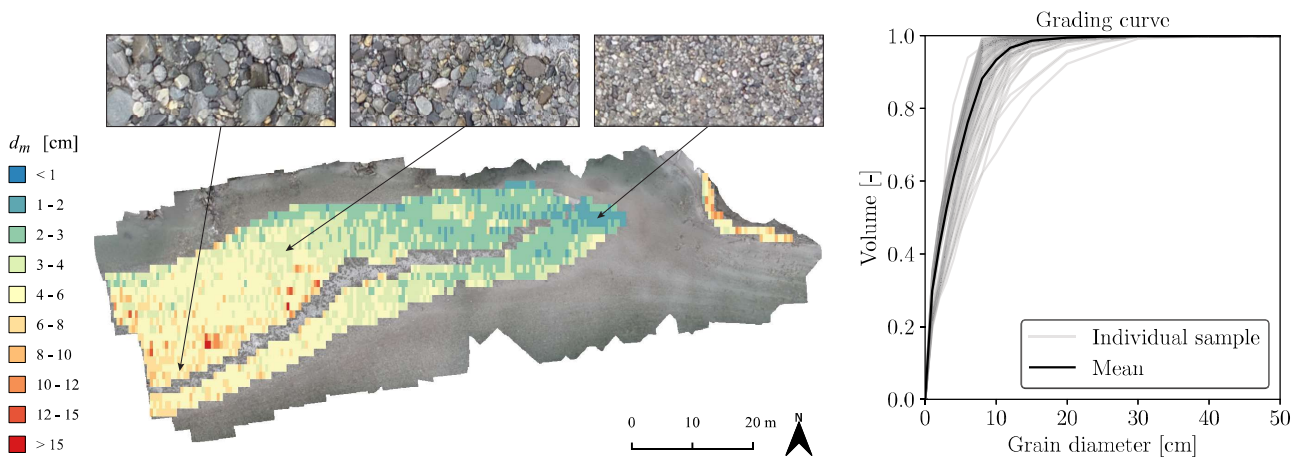

**Figure 5.** Illustration of the two final products generated with *GRAINet* on the river Rhone. Left: Map of the spatial distribution of characteristic grain sizes (here  $d_m$ ). Right: Grading curve for the entire gravel bar population, by averaging the predicted curves of individual line samples.

images is somewhat subjective and thus differs across different annotators. The advantage of our *digital line sampling* approach is that multiple experts can perform the labelling at the exact same location, which is infeasible if done in-situ because *line sampling* is disruptive and cannot be repeated. We perform experiments to answer two questions. First, what is the variation of multiple human annotations? Second, can the CNN learn a proper model, despite the inevitable presence of some label noise? We randomly selected 17 image tiles that are labelled by five skilled operators, who are familiar with traditional *line sampling* in the field.

#### 4.5 Final products

On one hand, by combining the output of *GRAINet* trained to either predict the *frequency* or the *volume* distribution with the approach proposed by Fehr (1987), we can obtain the grading curve (cumulative volume distribution) as well as the characteristic grain sizes (e.g.,  $d_m$ ). On the other hand, *GRAINet* can also be trained to directly predict characteristic grain sizes. The characteristic grain size  $d_m$  is only one example of how the proposed CNN architecture can be adapted to predict specific aggregate parameters. Ultimately, the *GRAINet* architecture allows one to predict grain size distributions or characteristic grain sizes densely for entire gravel bars, with high spatial resolution and at large scale, which makes the (subjective) choice of sampling locations redundant. These predictions can be further used to create two kinds of products, illustrated in Fig. 5:

1. Dense high-resolution maps of the spatial distribution of characteristic grain sizes.
2. Grading curves for entire gravel bars, by averaging the grading curves at individual line samples.



## 5 Experimental results

Our proposed *GRAINet* approach is quantitatively evaluated with 1,491 digital line samples collected on orthorectified images from 25 gravel bars located along 6 rivers in Switzerland (Sect. 3). We first analyze the quality of the collected ground truth data by comparing our digital line samples with field measurements. We then evaluate the performance of *GRAINet* for estimating the three different outputs:

- (i) relative frequency distribution (*frequency*)
- (ii) relative volume distribution (*volume*)
- 315 (iii) characteristic mean diameter ( $d_m$ )

In order to get an empirical upper bound for the achievable accuracy, we compare the performance of *GRAINet* with the variation of repeated manual annotations. All reported results correspond to random 10-fold cross-validation, unless specified otherwise. In addition, we analyze the generalization capability of all three *GRAINet* models with the described geographical cross-validation procedure and investigate the error cases to understand the limitations of the proposed data-driven approach. Finally, as our CNN does not explicitly detect individual grains, we investigate the possibility to estimate grain sizes from lower image resolutions.

### 5.1 Experimental setup

For all experiments the data is separated into three disjoint sets, a *training* set to learn the model parameters; a *validation* set to tune hyper-parameters and to determine when to stop training to avoid overfitting; and a *test* set used only to assess the performance of the final model.

The initial learning rate is empirically set to 0.0003 and each batch contains 8 image tiles, which is the maximum possible within the 8 GB memory limit of our GPU (Nvidia GTX 1080). While we run all experiments for 150 epochs for convenience, the final model weights are taken from the epoch with the lowest validation loss. An individual experiment takes less than 4 hours to train. Due to the extensive cross-validation, we parallelize across multiple GPUs to run the experiments in reasonable time.

### 5.2 Quality of ground truth data

We evaluate the quality of the ground truth data in two ways. First, the *digital line samples* are compared with state-of-the-art in-situ line samples from field measurements. Second, the label uncertainty is studied by comparing repeated annotations by multiple skilled operators.

#### 5.2.1 Comparison to field measurements

From 22 out of the 25 gravel bars, two to three field measurements from experienced experts were available (see Fig. 6). To compare the digital and in-situ line samples, we derive the  $d_m$  values and compare them at the gravel bar level, because the

---

Number: 1 Author: patca Subject: Sticky Note Date: 17/07/2020 14:52:26

This is methods. Should be shifted above.

---

Number: 2 Author: patca Subject: Sticky Note Date: 17/07/2020 14:53:00

I am concerned by this run of 150 epochs. Large networks trained for a long time on small datasets usually severely overfit.

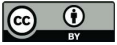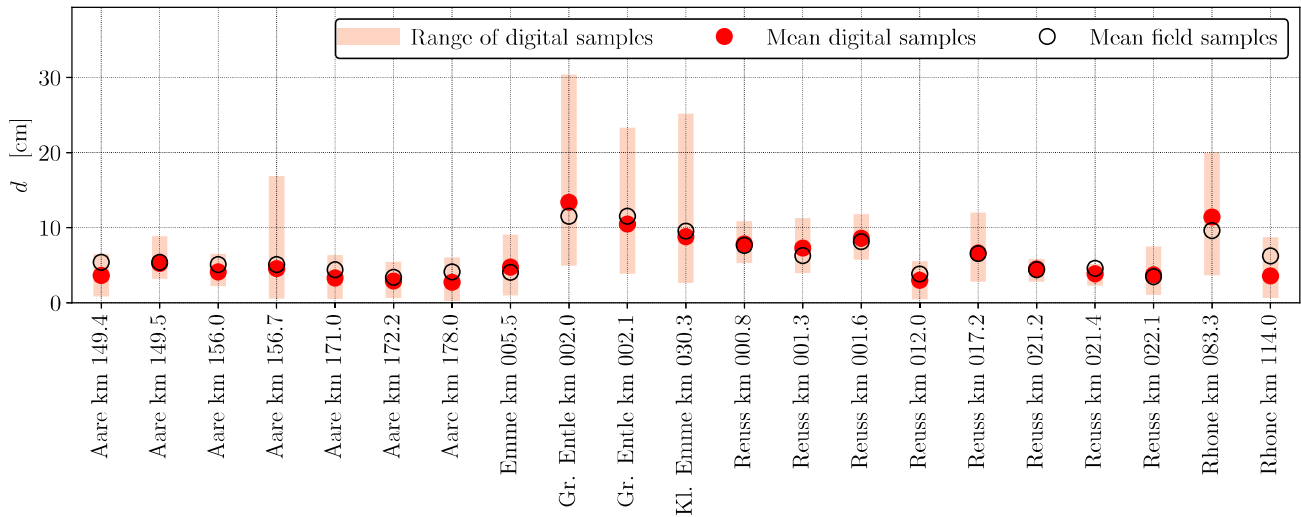

**Figure 6.** Comparison of digital line samples with 22 in-situ line samples collected in the field.

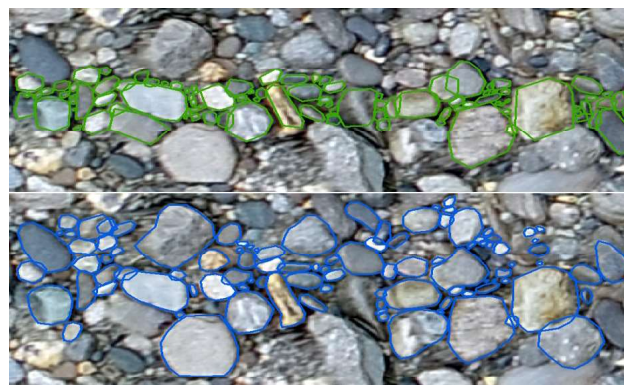

**Figure 7.** Repeated annotations of the same tile by two experts.





field measurements are only geo-localized to that level. Some field measurements were accomplished a few days apart from the UAV surveys. We expect grain size distributions to remain unchanged, as no significant flood event occurred during that time. Figure 6 indicates that the field-measured  $d_m$  is always within the range of the values derived from the *digital line samples*. Furthermore, the mean of the field samples agrees well with the mean of the digital samples. The wide range of the *digital line samples* emphasizes that the choice of a single line sample in the field is very crucial and that it requires a lot of expertise to choose a few locations that yield a meaningful sample of the entire gravel bar population. We conclude that, overall, no bias exists between the field measurements and the *digital line samples*. Hence, the latter is considered to be representative and is in the following referred to as the *ground truth*.

### 5.2.2 Label uncertainty from repeated annotations

We compute statistics of three to five repeated annotations of 17 randomly selected image tiles (see Table C1 in the Appendix) to analyze the (dis-)agreement between human annotators. The standard deviation of  $d_m$  across different annotators varies between 0.1 cm (*Aare km 172.2*) and 2.0 cm (*Rhone km 083.3*), the average standard deviation is 0.5 cm. Although these 17 samples are too few to compute reliable statistics, we get an intuition for the uncertainty of the *digital line samples*. Figure 7 shows two different annotations for the same image tile, to demonstrate the variation introduced by the subjective selection of valid grains. While the distribution in the upper annotation (in green) contains a larger fraction of smaller grains following closely the center line, the lower annotation (in blue) contains a larger fraction of larger grains, including some further away from the center line.

Recall that this comparison of multiple annotators is only possible because *digital line sampling* is non-destructive. In contrast, even though variations of similar magnitude are expected in the field, a quantitative analysis is not easily possible. Although CNNs are known to be able to handle a significant amount of label noise if trained on large datasets (Van Horn et al., 2015), the uncertainty of the manual ground truth annotations is also present in the test data and therefore represents a lower bound for the performance of the automated method. Therefore, while we do not expect the label noise to degrade the CNN training process, we do not expect mean absolute errors below 0.5 cm due to the apparent label noise in the test data.

### 5.3 Estimation of grain size distributions

As explained in Sect. 3.2, the process of obtaining a grading curve according to Fehr (1987) involves several empirical steps (Fig. 3). In this processing pipeline, the relative frequency distribution can be regarded as the initial measurement. However, as the choice of the proper CNN target is *a priori* not clear, we investigate the two options to estimate (i) the relative frequency distribution and (ii) the relative volume distribution. In the latter version, the CNN implicitly learns the conversion from frequency to fraction weighted quasi-sieve throughput, making that processing step obsolete. We experiment with three loss functions to train *GRAINet* for the estimation of discrete target distributions: the Earth mover's distance (EMD), the Kullback-Leibler divergence (KLD), and the Intersection over Union (IoU). For each trained model all three metrics are reported in Table 1. The standard deviation quantifies the performance variations across the 10 random data splits. Theoretically, one would expect the best performance under a given error metric  $D$  from the model trained to optimize that same metric, i.e. the



best performance per column should be observed on the diagonals in the two Tables. Note that each error measure lives in its own space, numbers are not comparable across columns.

|      |     | EMD (↓) | KLD (↓) | IoU (↑) |
|------|-----|---------|---------|---------|
| Loss | EMD | 0.43    | 0.15    | 0.72    |
|      |     | (0.03)  | (0.02)  | (0.01)  |
|      | KLD | 0.44    | 0.13    | 0.72    |
|      |     | (0.05)  | (0.01)  | (0.01)  |
|      | IoU | 0.42    | 0.16    | 0.73    |
|      |     | (0.04)  | (0.03)  | (0.01)  |

(a)

|      |     | EMD (↓) | KLD (↓) | IoU (↑) |
|------|-----|---------|---------|---------|
| Loss | EMD | 0.65    | 0.79    | 0.61    |
|      |     | (0.03)  | (0.24)  | (0.01)  |
|      | KLD | 0.68    | 0.32    | 0.60    |
|      |     | (0.05)  | (0.02)  | (0.01)  |
|      | IoU | 0.69    | 0.80    | 0.61    |
|      |     | (0.05)  | (0.19)  | (0.01)  |

(b)

**Table 1.** Results for *GRAINet* regressing (a) the relative *frequency* distribution and (b) the relative *volume* distribution. Mean and standard deviation (in parenthesis) for the random 10-fold cross validation. The rows correspond to the CNN models trained with the respective loss function. Arrows indicate if the error metric is minimized (↓, lower is better) or maximized (↑, higher is better).

### 5.3.1 Regressing the relative frequency distribution

When estimating the relative *frequency* distribution, all three loss functions yield rather similar mean performance, in all three error metrics (Table 1 (a)). The lowest KLD (mean of 0.13) and the highest IoU (mean of 0.73) are achieved by optimizing the respective loss function, whereas the lowest EMD is also achieved by optimizing the IoU. However, all variations are within one standard deviation. The KLD is slightly more sensitive than the other loss functions, with the largest relative difference (0.13 vs. 0.16) corresponding to a 23 % increase. All standard deviations are one order of magnitude smaller than the mean, meaning that the reported performance is not significantly affected by the specific splits into training and test sets.

### 5.3.2 Regressing the relative volume distribution

The regression performance for the relative *volume* distribution is presented in Table 1 (b). Here, the best mean performance is indeed always achieved by optimizing the respective loss function. The relative performance gap under the KLD error metric increases to 250 %, with 0.32 when trained with the KLD loss vs. 0.80 with the IoU loss. Also the standard deviation of the KLD between cross-validation folds exhibits a marked increase.

### 5.3.3 Performance depending on the *GRAINet* regression target

In comparison to the values reported in Table 1 (a), the KLD on the *volume* seems to be even more sensitive regarding the choice of the optimized loss function. Furthermore, all error metrics are worse when estimating the *volume* instead of the

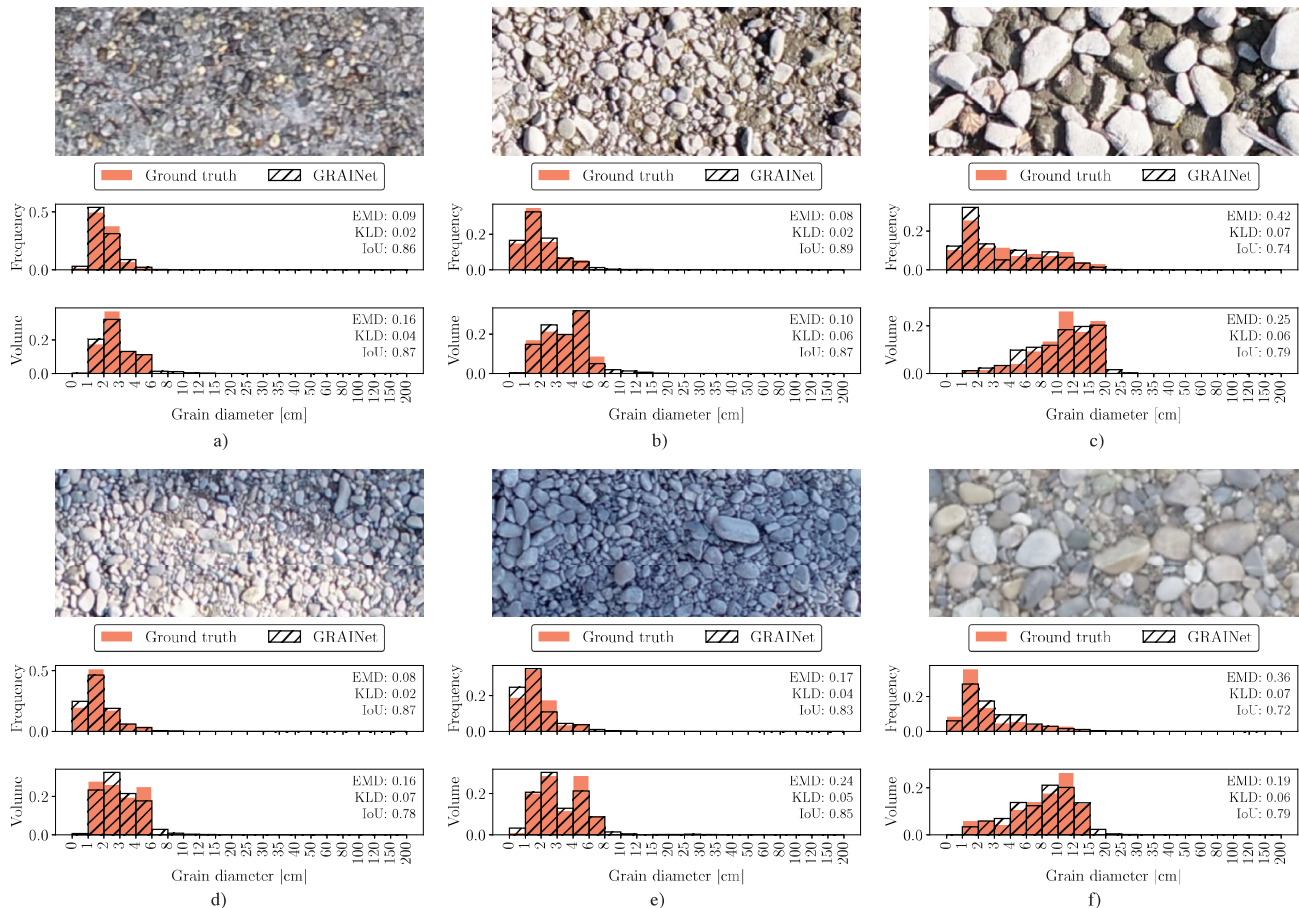

**Figure 8.** Example image tiles where the *GRAINet* regression of the relative *frequency* and *volume* distribution yields good performance.

*frequency* distribution: the best EMD increases from 0.42 to 0.65, the KLD from 0.13 to 0.32, and the best IoU decreases from 0.73 to 0.61.

390 Looking at the difference between the *frequency* and the *volume* distribution, we see a general shift of the probability mass to right-hand side of the distributions, which is clearly visible in Fig. 8 c, f. While the *frequency* is generally smoothly decreasing to zero probability mass towards the larger grain size fractions of the distribution, the *volume* has a very sharp jump at the last bin (Fig. 8 c, f), where the largest grain — often only a single one (Fig 9 b, f) — has been measured.

395 Figure 8 displays examples of various lighting conditions and grain size distributions, where *GRAINet* yields a good performance for both targets. On the other hand, the error cases in Fig. 9 represent the limitations of the model. While e.g. extreme lighting conditions deteriorate the performance on both targets similarly (Fig 9 a), the rare radiometry caused by moss (Fig 9 d) has a stronger effect on the *volume* prediction.

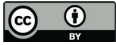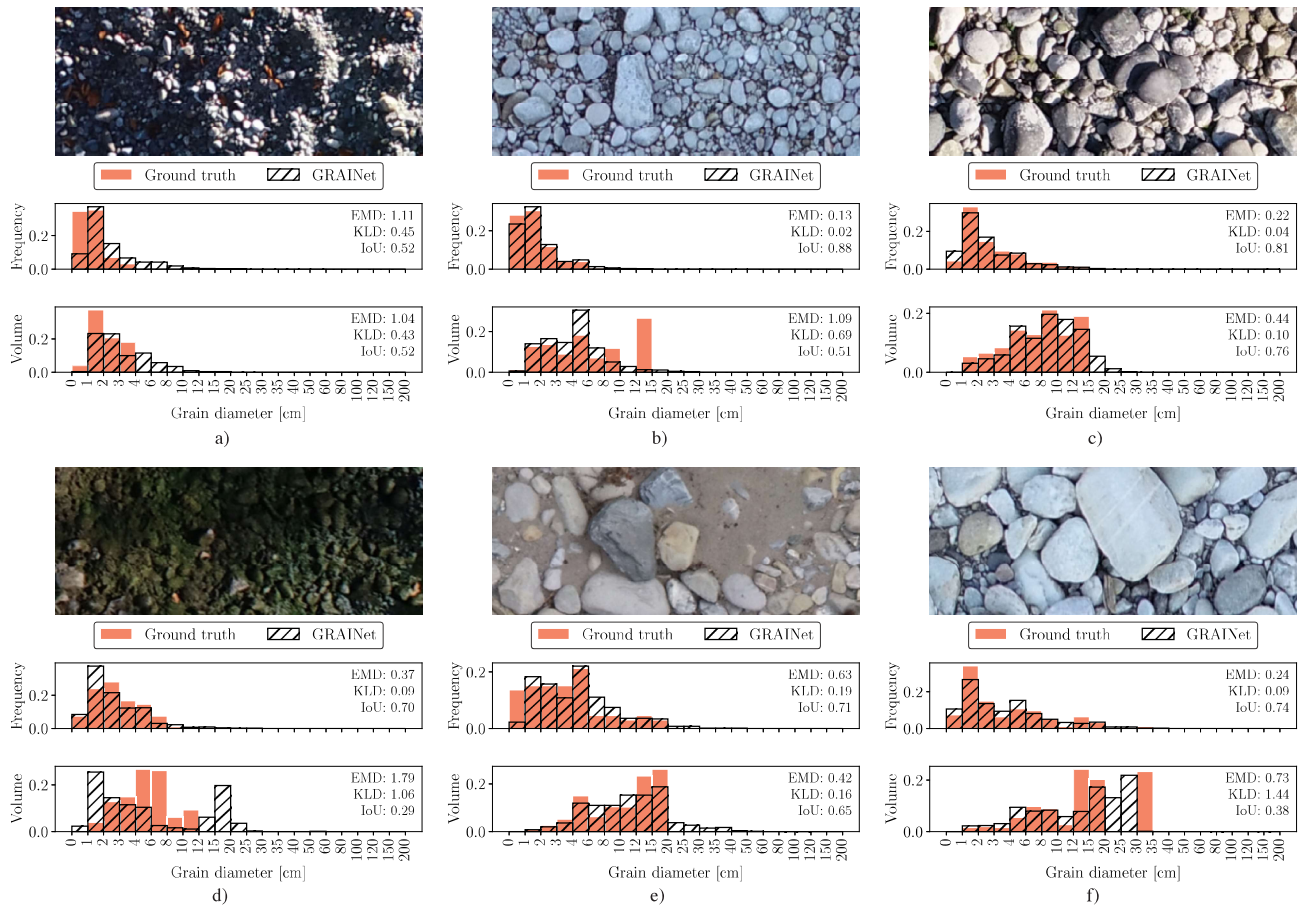

**Figure 9.** Error cases where the *GRAINet* regression of the relative *frequency* and *volume* distribution fails.

Comparing the predictions with the ground truth distributions in Fig. 9, the *GRAINet* predictions seem to be generally smoother for both *frequency* and *volume*. More specifically, the predicted distributions have longer tails (Fig 9a, c, e) and closed gaps of empty bins (Fig. 9f).

In combination with the smoother output of the CNN, the sharp jump in the *volume* distribution could be an explanation for the generally worse approximation of the *volume* compared to the *frequency*.

### 5.3.4 Grading curves for entire gravel bars

We compute grading curves from the predicted relative *frequency* and *volume* distributions as described in Sect. 3.2. Furthermore, we average the individual curves to obtain a single grading curve per gravel bar. We show example grading curves obtained with the three different loss functions in Fig. 10. The top row shows a distribution of rather fine grains while the bottom row represents a gravel bar of coarse grains. Regarding the fine gravel bar (Fig. 10, top), the difference between the

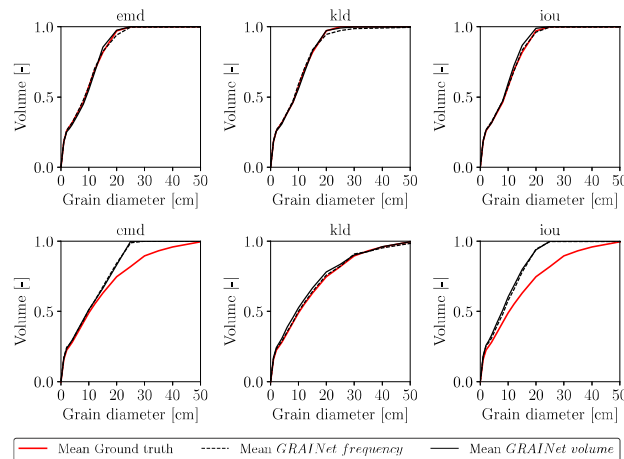

**Figure 10.** Grading curves resulting from optimizing different loss functions (from left to right: EMD, KLD, IoU) for two example gravel bars, namely *Gr. Entle km 002.0* (top) and *Reuss km 001.6* (bottom).

three loss functions is hard to observe. Yet, there is a tendency of overestimating the coarse fraction if optimizing for KLD. However, only KLD can reproduce the grading curve of the coarse gravel bar reasonably well (Fig. 10, bottom). Overall, the experiments indicate that the KLD loss yields best performance for all three error metrics. Thus, to assess the effect of the target choice (*frequency* vs. *volume*) on the final grading curves of all 25 gravel bars, we use the *GRAINet* trained with the KLD loss (Fig. 11). Both models approximate the ground truth curves well and are able to reproduce various shapes (e.g., *Aare km 171.2* vs. *Reuss km 001.3*). However, the grading curves derived from the predicted *frequency* distribution (dashed curves) tend to overestimate higher percentiles (e.g. *Aare km 171.0*).

415 This qualitative comparison indicates that regressing the *volume* distribution with *GRAINet* yields slightly better grading curves than for the *frequency* distribution. If computing the grading curve from the predicted frequency distribution, small errors in the bins with larger grains are propagated and amplified in a non-linear way due to the fraction weighted transformation described in Sect. 3.2. In contrast, the *volume* distribution already includes this non-linear transformation and consequently errors are smaller.

#### 420 5.4 Estimation of characteristic grain sizes

Characteristic grain sizes can either be derived from the predicted distributions or *GRAINet* can be trained to directly predict variables like the mean diameter  $d_m$  as scalar outputs.

##### 5.4.1 Regressing the mean diameter $d_m$

We again analyze the effect of different loss functions, namely the mean squared error (MSE) and the mean absolute error (MAE) when training *GRAINet* to estimate  $d_m$  end-to-end, see Table 2. Optimizing for MAE achieves slightly lower errors

425

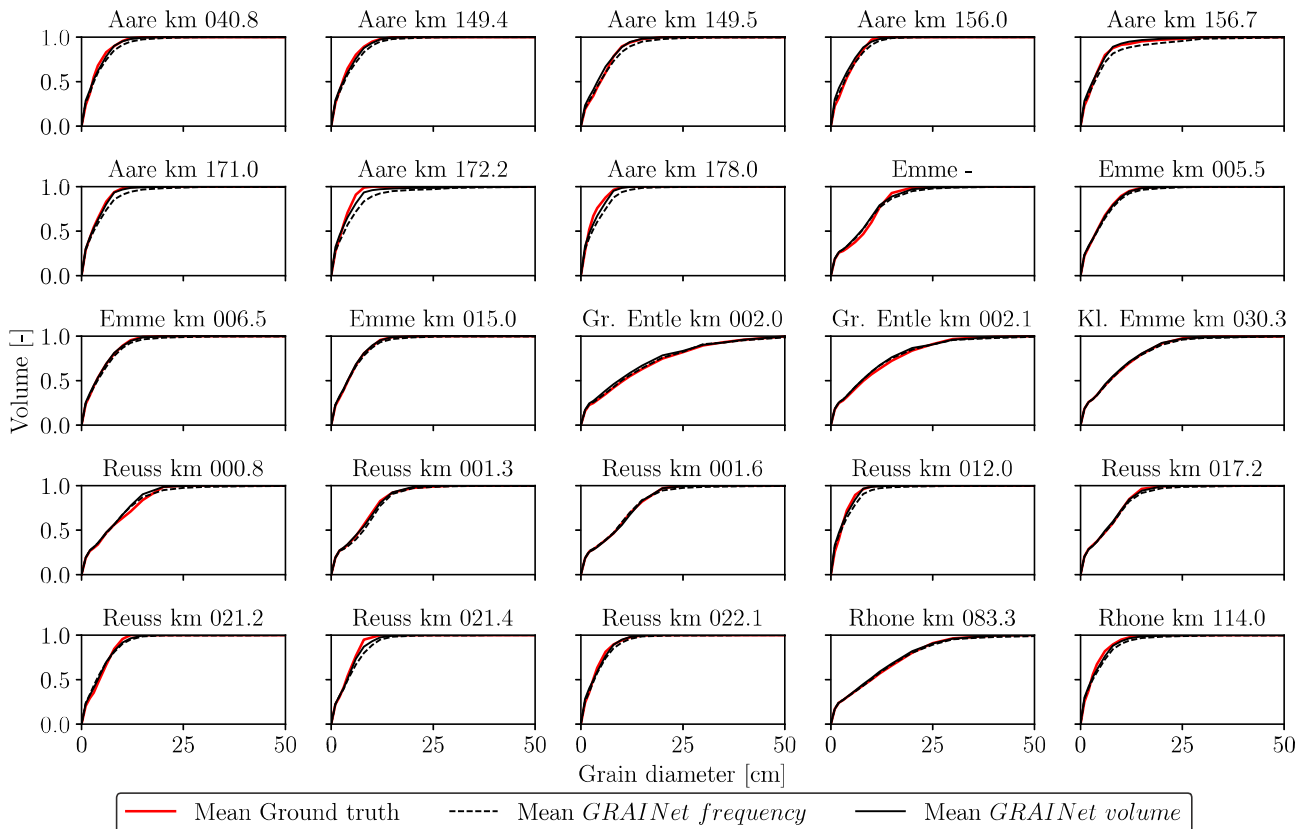

**Figure 11.** Grading curves of the 25 gravel bars, estimated with random 10-fold cross-validation.

under both metricx (3.05 cm<sup>2</sup>, respectively 0.99 cm). However, optimizing for MAE results in significantly stronger bias, with a ME of  $-0.11$  cm (underestimation), compared to 0.02 cm for the MSE. As for practical applications a low bias is considered more important, we use *GRAINet* trained with the MSE loss for further comparisons.

#### 5.4.2 Performance for different regression targets

430 If our target quantity is the  $d_m$ , we now have different strategies. The classical multi-step approach would be to measure frequencies, convert them to volumes, and derive the  $d_m$  from those. Instead of estimating the frequency, we could also directly estimate volumes, or predict the  $d_m$  directly from the image data. Which approach works best? Based on the results shown so far (Table 1 and 2), we compare the  $d_m$  derived from *frequency* and *volume* distributions (trained with KLD) to the end-to-end prediction of  $d_m$  (trained with MSE), see Fig. 12. Regardless of the *GRAINet* target, the ME lies within  $\pm 0.7$  cm, the MAE is  
 435 smaller than 1.5 cm, and the absolute dispersion increases with increasing  $d_m$ . With ground truth  $d_m$  values ranging from 1.3 cm to 29.3 cm, only the end-to-end  $d_m$  prediction covers the full range down to 1.3 cm and up to 24 cm. In contrast, the smallest

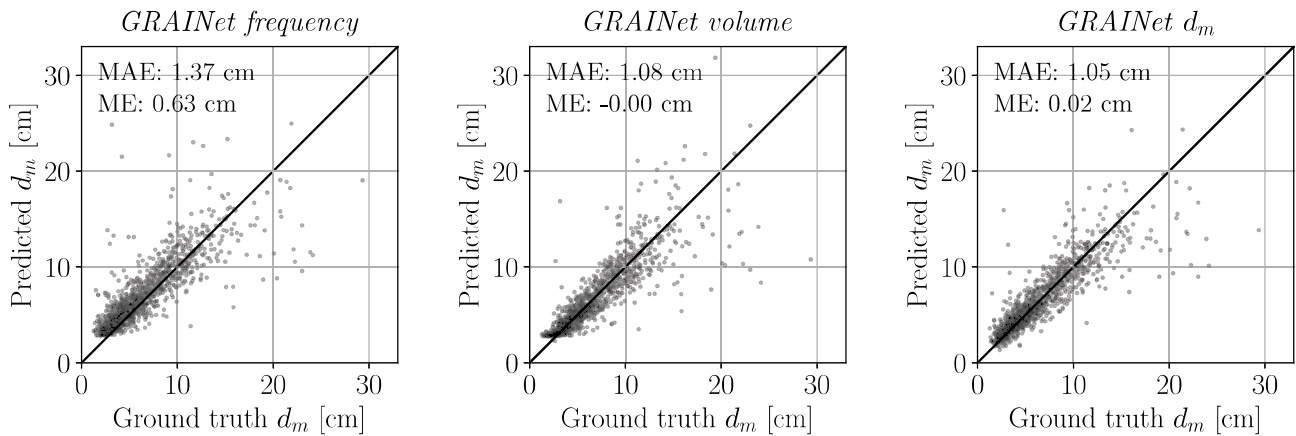

**Figure 12.** Scatter plots of the estimated  $d_m$  in cm from the three *GRAINet* outputs: *frequency*, *volume*, and  *$d_m$*  (left to right). The ground truth  $d_m$  on the horizontal axis and predicted  $d_m$  on the vertical axis.

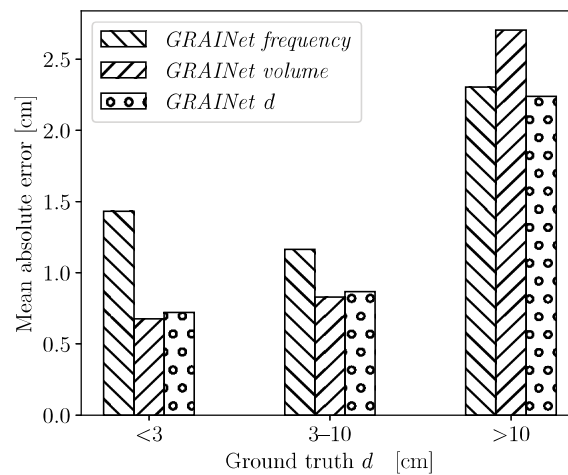

**Figure 13.** Mean absolute error of the predicted  $d_m$  for three  $d_m$ -categories: <3 cm, 3–10 cm, and >10 cm



|      |     | MSE ( $\downarrow$ ) | MAE ( $\downarrow$ ) | ME (0) |
|------|-----|----------------------|----------------------|--------|
| Loss | MSE | 3.05                 | 1.05                 | 0.02   |
|      |     | (1.03)               | (0.13)               | (0.18) |
|      | MAE | 3.04                 | 0.99                 | -0.11  |
|      |     | (1.03)               | (0.12)               | (0.25) |

**Table 2.** Results for *GRAINet* regressing the mean diameter  $d_m$  [cm]. Mean and standard deviation (in parenthesis) for the random 10-fold cross validation. The rows correspond to the CNN models trained with the respective loss function. While both MSE and MAE are minimized ( $\downarrow$ ), the ME is optimal with zero bias (0).

$d_m$  derived from the predicted *frequency* and *volume* distribution are 2.9 cm and 2.3 cm, respectively. I.e.,  $d_m$ -values  $< 3.0$  cm tend to be overestimated when derived from intermediate histograms. This is mainly due to unfavourable error propagation, as slight overestimates of the larger fractions are amplified into more serious overestimates of the characteristic mean diameter  $d_m$ . While the  $d_m$  derived from the *volume* prediction yields a comparable MAE of 0.7 cm for ground truth  $d_m < 3$  cm, only the end-to-end regression is able to predict extreme small, but apparently rare, values (Fig. 13). The end-to-end  $d_m$  regression yields a MAE of 0.9 cm for  $d_m$ -values between 3 and 10 cm and 2.2 cm for values  $> 10$  cm.

We conclude that end-to-end regression of  $d_m$  performs best. It achieves the lowest overall MAE ( $< 1.1$  cm) and at the same time it is able to correctly recover  $d_m$  below 3.0 cm.

#### 5.4.3 Mean $d_m$ for entire gravel bars

In order to calibrate numerical bedload transport models, a single representative  $d_m$ -value of a gravel bar or a cross-section is essential. To assess whether the performance of *GRAINet* is useful for this purpose, the *GRAINet* end-to-end  $d_m$  predictions are averaged over each gravel bar and compared with the respective mean  $d_m$  of the *digital line samples* (Fig. 14). The performance averaged over all 25 gravel bars results in a MAE of 0.3 cm and a ME of 0.1 cm. The error is  $< 1$  cm for all gravel bars, even for the bars at the River *Gr. Entle* and *Rhone*, which have a mean ground truth  $d_m > 10$  cm (Table B1). For 13 gravel bars the error is below  $\pm 0.2$  cm.

#### 5.4.4 Comparison to human performance

The average standard deviation  $\sigma$  of  $d_m$  from repeated digital line samples accounts for 0.5 cm (see Sect. 5.2) for 17 randomly selected tiles. In comparison, regressing  $d_m$  with *GRAINet* yields  $MAE = 1.1$  cm, from which 50% can be explained by the label noise in the test data. We illustrate the performance of *GRAINet* versus human performance in Fig. 15. The predicted  $d_m$ -values lie within  $1\sigma$  for 9 tiles (53%), and within  $2\sigma$  for 12 tiles (70%).



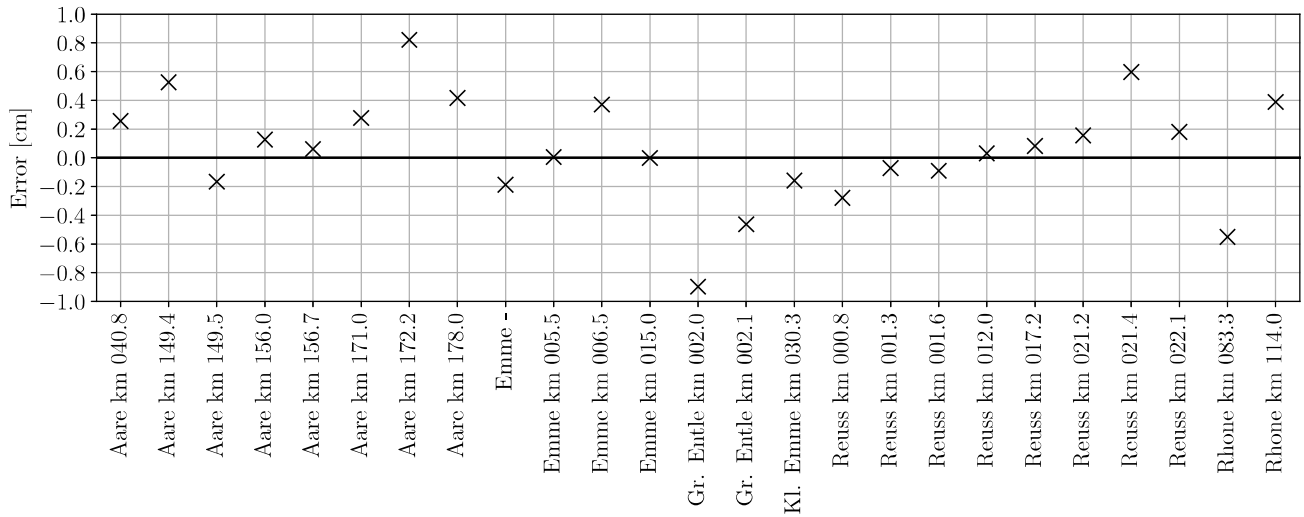

**Figure 14.** Error of the mean  $d_m$  per gravel bar derived from the *GRAINet* end-to-end  $d_m$  predictions.

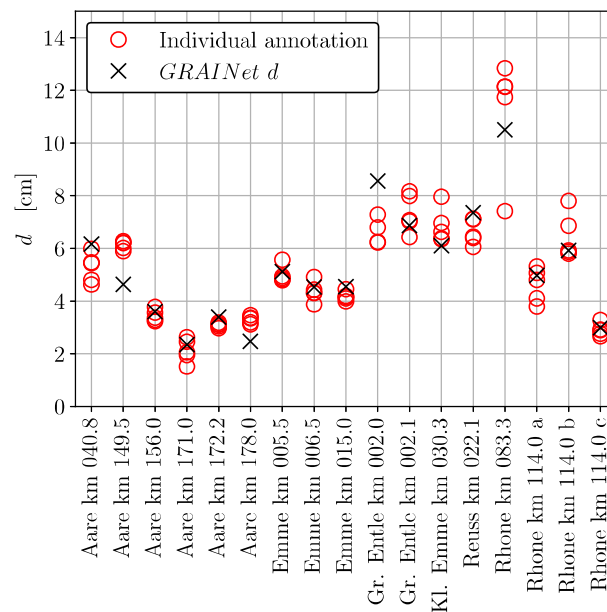

**Figure 15.** Variation of  $d_m$  annotated by three to five different human experts, compared to end-to-end  $d_m$  regression of *GRAINet*.

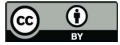

#### 5.4.5 High-resolution grain size maps

A notable strength of *GRAINet* is that it offers the possibility to predict and map characteristic grain sizes densely for entire gravel bars with high resolution (1.25 m × 0.5 m). Three example maps are presented in Fig. 16. The mean ground truth  $d_m$  per gravel bar varies between 3.0 cm (*Reuss km 012.0*, top), 3.3 cm (*Aare km 171.0*, center), and >10 cm (*Gr. Entle km 002.1*, bottom). For all three examples the river flows northwards.

Obviously, the map created with *GRAINet* offers full coverage of the entire gravel bar, whereas *digital line samples* deliver only a sparse map. Not only do we see that *GRAINet* successfully predicts the spatial distribution of the  $d_m$  in the ground truth, it also reveals spatial patterns at a finer resolution.

Hence, *GRAINet* enables not only the assessment of difference between gravel bars but also the spatial variability and heterogeneity of  $d_m$ -values within a single gravel bar. Despite a similar mean  $d_m$  of approximately 3 cm, the spatial layout differs greatly between *Reuss* (top) and *Aare* (center), which becomes clear when looking at dense maps of the complete gravel bars. Such sorting effects are not observable in the third example of *Gr. Entle*.

#### 5.5 Generalization across gravel bars

We study the generalization capability of *GRAINet* to an unseen gravel bar with geographical cross-validation for regressing the grain size distribution and  $d_m$ . Note that we cannot completely isolate the effect of unseen grain size distributions from the influence of unseen imaging conditions, as each gravel bar was captured in a separate survey.

##### 5.5.1 Grading curves

Grading curves for all 25 gravel bars are given in Fig. 17. A qualitative comparison to Fig. 11 shows the effect of not seeing a single sample of the respective gravel bar during the training. The grading curves derived from the predicted *frequency* distribution seem to be less robust and overestimation of higher percentiles is increased for more than 50 % of all gravel bars. Exceptions are *Gr. Entle km 002.0* and *Rhone km 083.3*, where all percentiles are underestimated. As no striking differences are visible for about 20 gravel bars, we can say that the grading curves derived from the predicted *volume* distribution generalize (still) well in 80% of the cases.

##### 5.5.2 Mean diameter $d_m$

We also study the generalization regarding the estimation of the  $d_m$  (Fig. 18 and Fig. D1). The MAE of the random splits is <1 cm for 18 bars and <2 cm for 24 bars. When *GRAINet* is tested on unseen gravel bars (geographical cross-validation), the MAE does generally increase leading to only 15 bars <1 cm and 19 <2 cm. We observe the largest performance drop for *Aare km 156.7*, where the MAE increases from 1.4 cm (random 10-fold cross-validation) to 6 cm (geographical cross-validation). On this particular gravel bar, several tiles contain some wet and even flooded grains. Although the refraction of the shallow water could in principle change the apparent grain size, it is most likely *not* the main reason for the poor generalization. Rather, the

This does not sound all that different to other mapping approaches. Please clarify.

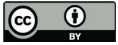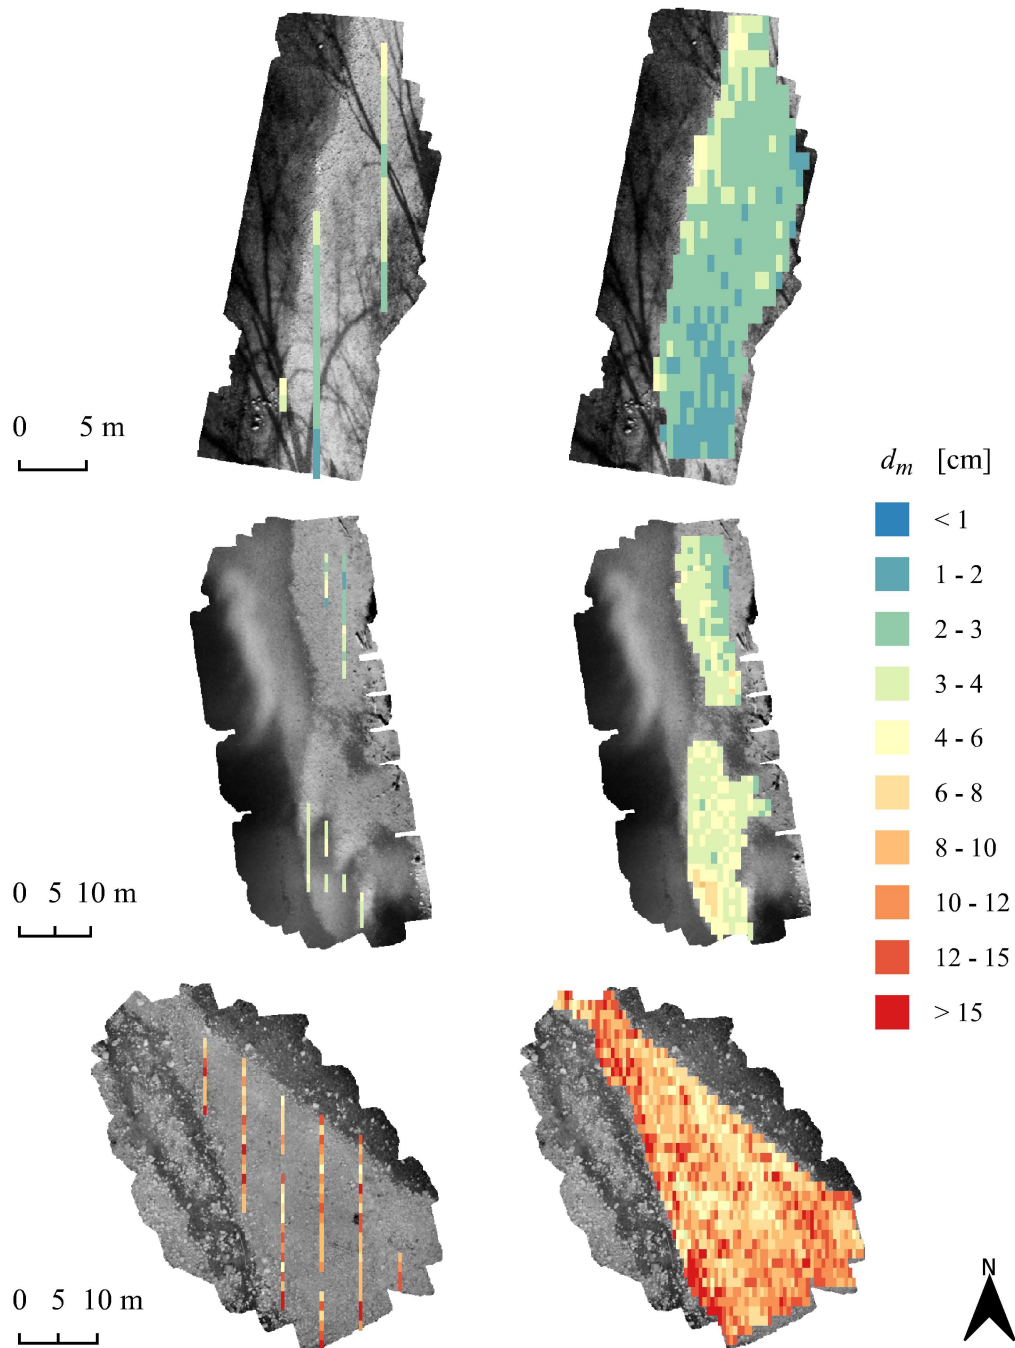

**Figure 16.** Maps of the characteristic mean diameter  $d_m$ , Hand-labeled ground truth, i.e. *digital line samples* (left) and *GRAINet* end-to-end  $d_m$  predictions (right). Gravel bars (top to bottom): *Reuss km 012.0*, *Aare km 171.0*, and *Grosse Entle km 002.1*. The background is a gray scale version of the input UAV image.

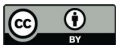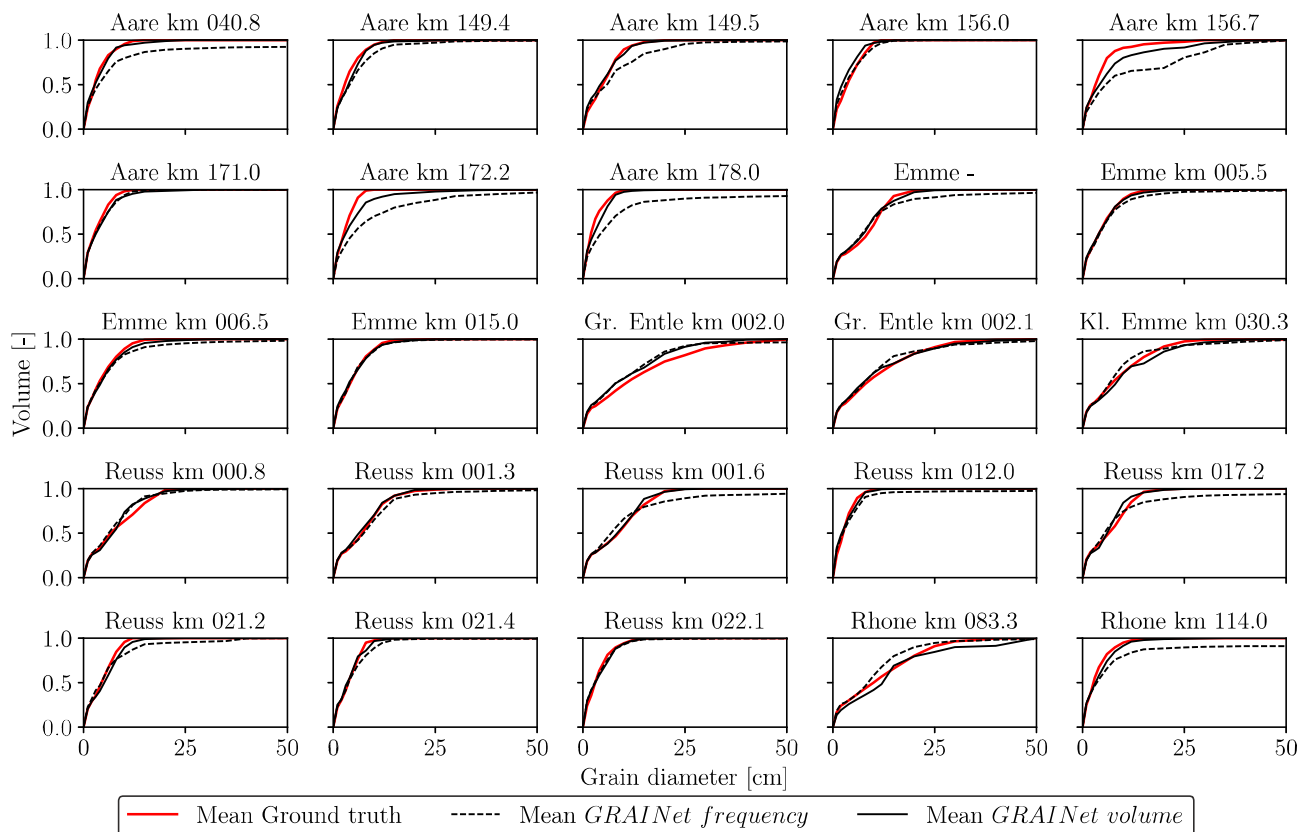

**Figure 17.** Grading curves of the 25 gravel bars, estimated with geographical cross-validation.

model has simply not learned the radiometric characteristics of wet grains, as there aren't any among the samples from the other bars, used for training.

## 5.6 Effect of the image resolution

490 *GRAINet* does not explicitly detect individual grains, but learns to identify global texture patterns. It thus seems feasible to apply *GRAINet* to images of lower resolution, where individual grains would no longer be recognizable by a human annotator (see example in Fig. 19). To simulate that situation, we bilinearly downsample the original image resolution of 0.25cm by factors 2, 4, 8, 16, 32, and 40, corresponding to pixel sizes of 0.5, 1.0, 2.0, 4.0, 8.0, and 10.0cm, respectively. The CNN model is then trained and evaluated at each resolution separately. When regressing *frequency* or *volume* distribution, the performance decreases rather continuously with decreasing resolution (see Figs. E1 and E2). Interestingly, the performance for regressing  $d_m$  with *GRAINet* drops only after downsampling with factor 16 (4cm resolution) to a MAE of 1.4cm and reaches a MAE of 1.9cm at factor 40 (10cm resolution) (Fig. 20). Corresponding  $d_m$  scatter plots are shown in Fig. E3, where dispersion grows

495

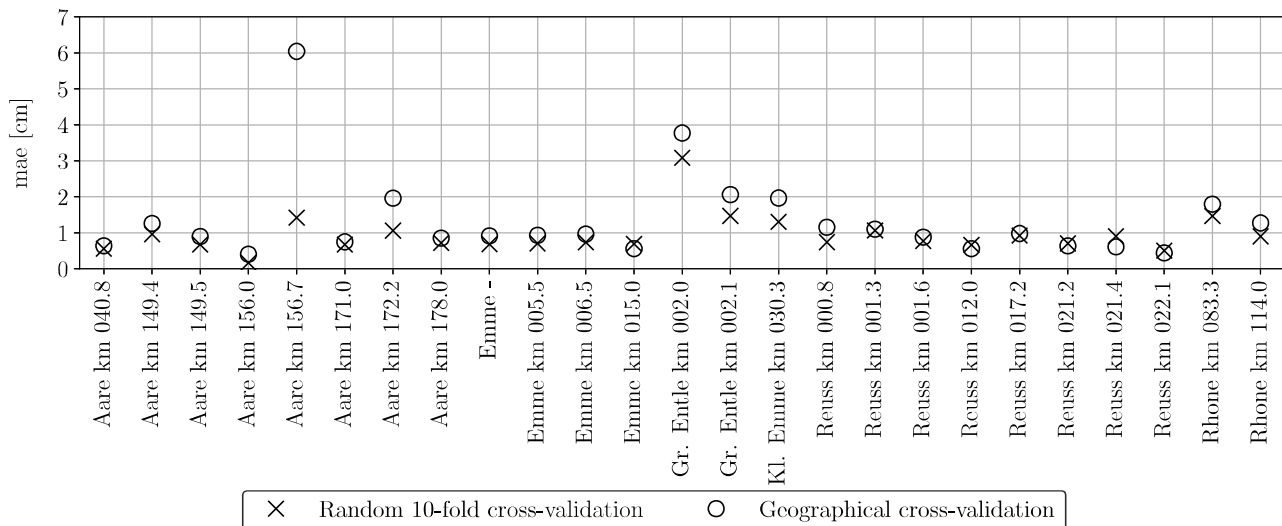

**Figure 18.** Mean absolute error of the *GRAINet* end-to-end  $d_m$  regression per gravel bar (random – and geographical cross-validation).

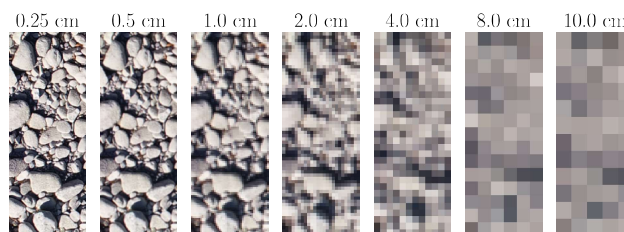

**Figure 19.** Example image tile resampled to lower resolutions. Left to right: full resolution of 0.25 cm and tested downsampling factors: 2, 4, 8, 16, 32, 40 corresponding to: 0.5, 1.0, 2.0, 4.0, 8.0, 10.0 cm.

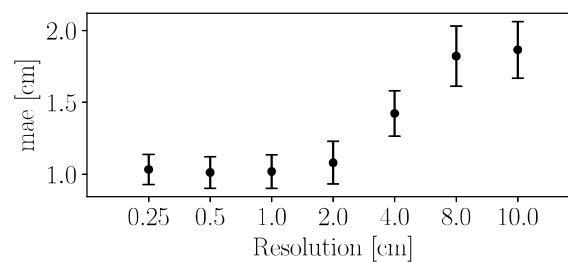

**Figure 20.** Performance of *GRAINet*  $d_m$  regression with different image resolutions (trained with MSE loss).

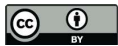

with coarser resolution. Avoiding the explicit detection of individual grains with the proposed regression approach has great potential and allows us to make reasonable predictions of  $d_m$  even at lower image resolutions, and to adapt the resolution to the accuracy requirements of the application. In contrast to Carboneau (2005), our *GRAINet* is able to predict mean diameters smaller than the ground sampling distance (Fig. E3), taking a big step towards grain size mapping beyond the image resolution. We believe that, in principle, *GRAINet* could even be used to process airborne imagery from country-wide flight campaigns.

## 6 Discussion

We have shown that *GRAINet* is able to estimate the mean grading curve of a gravel bar and to densely map the spatial distribution of the  $d_m$ .

### 6.1 Advantages and limitations of the approach

Our CNN-based approach makes it possible to robustly estimate grain size distributions and characteristic mean diameters from raw images. By analyzing global image features, *GRAINet* avoids the explicit detection of individual grains, which makes the model more efficient and leads to a robust performance, even with lower image resolutions. The proposed approach enables the automatic analysis of entire gravel bars without destructive measures and with reasonable effort.

Advantages are manifold. First, results are objective and reproducible, as they are not influenced by a subjectively chosen sampling location and grain selection. Second, the resulting curves and  $d_m$  represent the whole variability of grains of a gravel bar and thus the disproportionately high effect of single coarse grains on the curve and on  $d_m$  can be reduced. Consequently, the derived mean curves and its characteristic grain sizes can be considered representative.

Our experiments highlight some limitations due to the limited sample size for training. While 10-fold cross-fold validation yields very satisfying results, the poorer performance of the geographical cross-validation reveals that collecting and annotating sufficiently large and varied training sets is essential. Additionally, the performance of *GRAINet* deteriorates for very coarser gravel bars, as indicated by the error metrics of the distributions as well as for  $d_m$ . The lower performance is caused by larger variability and by the high impact of individual, large grains, as well as by the unbalanced data distribution (only 14% of the digital line samples have a  $d_m > 10$  cm). Application of *GRAINet*, trained with our dataset, is thus not always satisfactory for coarse, unseen gravel bars. In order to improve results and extend potential applications fields, further digital line samples from additional UAV surveys should be collected.

### 6.2 Potential applications

The presented *GRAINet* method can be applied to all rivers that fulfil the following conditions: dry gravel bars (meaning low water conditions, as grains in deeper water cannot be analysed) and no obstacles in the flight area (especially trees along the rivers can cause occlusions). Despite these limitations, we are convinced that our results confirm the large potential of UAV surveys in combination with CNNs for grain size analysis. There are several applications which become possible with *GRAINet* in a quality that was hitherto not achievable. Perhaps the greatest asset is the creation of dense, spatially explicit, georeferenced

---

Number: 1      Author: patca      Subject: Sticky Note      Date: 17/07/2020 14:57:18

I have no doubt that DL approaches will surpass texture-based approaches, but more discussion is needed here because the texture based approaches are quite suitable for the same data source. You need to repeat the error statistics here and cite some errors from texture based approaches to demonstrate that GRAINet is better.

---

Number: 2      Author: patca      Subject: Sticky Note      Date: 17/07/2020 14:57:47

And this is boot strapping. Any botstrapped saple will have training data from all rivers. It is not proper out-of-sample validation.





maps of  $d_m$ . Not only can they help to understand spatial sorting effects of bedload transport processes, they can also be used  
530 to calibrate two- or even three-dimensional fractional transport models. In addition, the variability of  $d_m$  within a gravel bar  
can provide important information regarding the bedload regime and the ecological value of the river (e.g., as aquatic habitat).  
For example, a lack of variability in the finer grain sizes is a clear sign for bed armouring and thus an important indicator for  
a bedload deficit. Consequently, the maps of  $d_m$  are ideal for large-scale monitoring in space and time, since they open up the  
possibility to study entire bars or river branches at virtually no additional cost.

535 Due to the high resolution of the resulting maps, local effects on bars can be investigated. Ultimately, this could allow  
hydrologists to explore new research directions that advance the understanding of fluvial geomorphology. While spatially  
explicit data may lead to an improved calibration of numerical models, we may gain new insights into how spatial heterogeneity  
affects the sediment transport capacity as well as the aquatic biodiversity.

## 7 Conclusions and future work

540 We have presented *GRAINet*, a data-driven approach centered on deep learning that allows to successfully replace the gold  
standard *line sampling* in the field (Fehr, 1987) by analyzing georeferenced UAV images with a convolutional neural network.  
In an experimental evaluation with 1,491 *digital line samples*, the method achieves accuracies that makes it relevant for several  
practical applications. The new possibility to carry out holistic analyses of entire gravel bars overcomes the limitations of the  
sparse sample-based *line sampling* approach, which is cumbersome and prone to subjective biases.

545 As CNNs are generic machine learning models, they offer great flexibility to directly predict other variables, like for example  
the ratio  $d_{84}/d_{16}$  or other specific percentiles (Buscombe, 2019). In fact, it might be promising to design a multitask approach,  
in order to exploit the correlations and synergies between different variables that describe the same grain size distribution.  
Obviously, collecting more training data can be expected to benefit the generalization performance of *GRAINet*. Data annotation  
could potentially supported with *active learning* (e.g. Settles, 2009), where the model is gradually updated and intermediate  
550 predictions guide the selection of the most informative samples that should be labeled to further improve the model.

Another technically interesting direction to explore is *domain adaptation*, in order to exploit *unlabeled* image data as a source  
of information and improve the generalization to a new domain with potentially different characteristics (i.e., new gravel bars).

Lastly, one could potentially support the still necessary manual annotation process using training-free image processing  
tools, such as the open source software BASEGRAIN (Detert and Weitbrecht, 2012). Such tools may speed up labelling of  
555 comparatively easy samples that can be processed without too much parameter tuning. Manual (re)labelling would still be  
required to prevent the CNN from replicating the systematic biases and failures of the rule-based system, but could focus on  
the challenging samples.



## Appendix B: Overview of investigated gravel bars

| Gravel bar name       | Slope<br>[%] | Bed width<br>[m] | Annual mean runoff<br>[m <sup>3</sup> /s] | Num. labels<br>[-] | Mean $d_m$<br>[cm] | Min $d_m$<br>[cm] | Max $d_m$<br>[cm] | Range $d_m$<br>[cm] |
|-----------------------|--------------|------------------|-------------------------------------------|--------------------|--------------------|-------------------|-------------------|---------------------|
| Aare km 040.8         | 0.02         | 75               | 221                                       | 114                | 3.5                | 1.7               | 8.5               | 6.8                 |
| Aare km 149.4         | 0.07         | 100              | 172                                       | 30                 | 3.6                | 1.9               | 5.4               | 3.6                 |
| Aare km 149.5         | 0.07         | 100              | 172                                       | 12                 | 5.2                | 4.2               | 7.8               | 3.6                 |
| Aare km 156.0         | 0.02         | 75               | 122                                       | 5                  | 4.1                | 3.2               | 5.5               | 2.2                 |
| Aare km 156.7         | 0.02         | 75               | 122                                       | 40                 | 4.5                | 1.6               | 15.9              | 14.3                |
| Aare km 171.0         | 0.12         | 60               | 122                                       | 42                 | 3.3                | 1.5               | 5.3               | 3.8                 |
| Aare km 172.2         | 0.12         | 60               | 122                                       | 60                 | 2.9                | 1.7               | 4.4               | 2.8                 |
| Aare km 178.0         | 0.12         | 60               | 122                                       | 32                 | 2.7                | 1.3               | 5.0               | 3.8                 |
| Emme km -             | -            | -                | -                                         | 14                 | 7.9                | 6.3               | 9.5               | 3.2                 |
| Emme km 005.5         | 0.46         | 50               | 14                                        | 190                | 4.7                | 2.0               | 8.0               | 6.0                 |
| Emme km 006.5         | 0.46         | 50               | 14                                        | 116                | 4.6                | 2.5               | 7.7               | 5.2                 |
| Emme km 015.0         | 0.59         | 75               | 14                                        | 78                 | 4.8                | 2.9               | 8.9               | 6.0                 |
| Grosse Entle km 002.0 | 1.50         | 60               | 2.5                                       | 76                 | 13.4               | 6.0               | 29.3              | 23.4                |
| Grosse Entle km 002.1 | 1.50         | 60               | 2.5                                       | 90                 | 10.5               | 4.9               | 22.3              | 17.4                |
| Kleine Emme km 030.3  | 1.40         | 63               | 6.2                                       | 212                | 8.8                | 3.7               | 24.1              | 20.5                |
| Reuss km 000.8        | 0.14         | 70               | 140                                       | 22                 | 7.8                | 6.3               | 9.8               | 3.5                 |
| Reuss km 001.3        | 0.14         | 70               | 140                                       | 16                 | 7.3                | 5.0               | 10.3              | 5.3                 |
| Reuss km 001.6        | 0.14         | 70               | 140                                       | 22                 | 8.6                | 6.8               | 10.8              | 4.0                 |
| Reuss km 012.0        | 0.17         | 80               | 140                                       | 34                 | 3.0                | 1.5               | 4.5               | 3.0                 |
| Reuss km 017.2        | 0.19         | 110              | 140                                       | 66                 | 6.6                | 3.8               | 11.0              | 7.2                 |
| Reuss km 021.2        | 0.18         | 60               | 140                                       | 6                  | 4.5                | 3.9               | 4.8               | 1.0                 |
| Reuss km 021.4        | 0.18         | 60               | 140                                       | 4                  | 3.9                | 3.3               | 4.1               | 0.8                 |
| Reuss km 022.1        | 0.18         | 60               | 140                                       | 30                 | 3.7                | 2.1               | 6.4               | 4.4                 |
| Rhone km 083.3        | 1.50         | 100              | 110                                       | 74                 | 11.4               | 4.7               | 19.0              | 14.3                |
| Rhone km 114.0        | 0.18         | 60               | 42                                        | 106                | 3.6                | 1.7               | 7.7               | 6.0                 |

**Table B1.** Overview of the 25 investigated gravel bars. From left to right: Slope and bed width of the river at this location with the corresponding annual mean water runoff. Number of annotated image tiles (*digital line samples*). Ground truth statistics of the characteristic mean diameter  $d_m$ .



### Appendix C: Repeated human annotation

| Image tile name       | Mean | Standard deviation | Min | Max  | Range |
|-----------------------|------|--------------------|-----|------|-------|
| Aare km 040.8         | 5.3  | 0.5                | 4.6 | 6.0  | 1.4   |
| Aare km 156.0         | 3.4  | 0.2                | 3.2 | 3.8  | 0.5   |
| Aare km 149.5         | 6.1  | 0.1                | 5.9 | 6.3  | 0.4   |
| Aare km 172.2         | 3.1  | 0.1                | 3.0 | 3.2  | 0.2   |
| Aare km 171.0         | 2.1  | 0.4                | 1.5 | 2.6  | 1.1   |
| Aare km 178.0         | 3.3  | 0.1                | 3.1 | 3.5  | 0.3   |
| Emme km 005.5         | 5.0  | 0.3                | 4.8 | 5.6  | 0.8   |
| Emme km 006.5         | 4.4  | 0.3                | 3.9 | 4.9  | 1.0   |
| Emme km 015.0         | 4.2  | 0.2                | 4.0 | 4.5  | 0.5   |
| Grosse Entle km 002.0 | 6.6  | 0.4                | 6.2 | 7.3  | 1.1   |
| Grosse Entle km 002.1 | 7.3  | 0.6                | 6.4 | 8.2  | 1.7   |
| Kleine Emme km 030.3  | 6.9  | 0.6                | 6.3 | 8.0  | 1.6   |
| Reuss km 022.1        | 6.6  | 0.4                | 6.1 | 7.1  | 1.1   |
| Rhone km 083.3        | 11.3 | 2.0                | 7.4 | 12.8 | 5.4   |
| Rhone km 114.0 a      | 6.5  | 0.8                | 5.8 | 7.8  | 2.0   |
| Rhone km 114.0 b      | 4.6  | 0.6                | 3.8 | 5.3  | 1.5   |
| Rhone km 114.0 c      | 2.9  | 0.2                | 2.7 | 3.3  | 0.6   |

**Table C1.** Statistics of the mean diameter  $d_m$  [cm] from three to five human annotations for 17 randomly selected image tiles.



560 Appendix D: Generalization across gravel bars

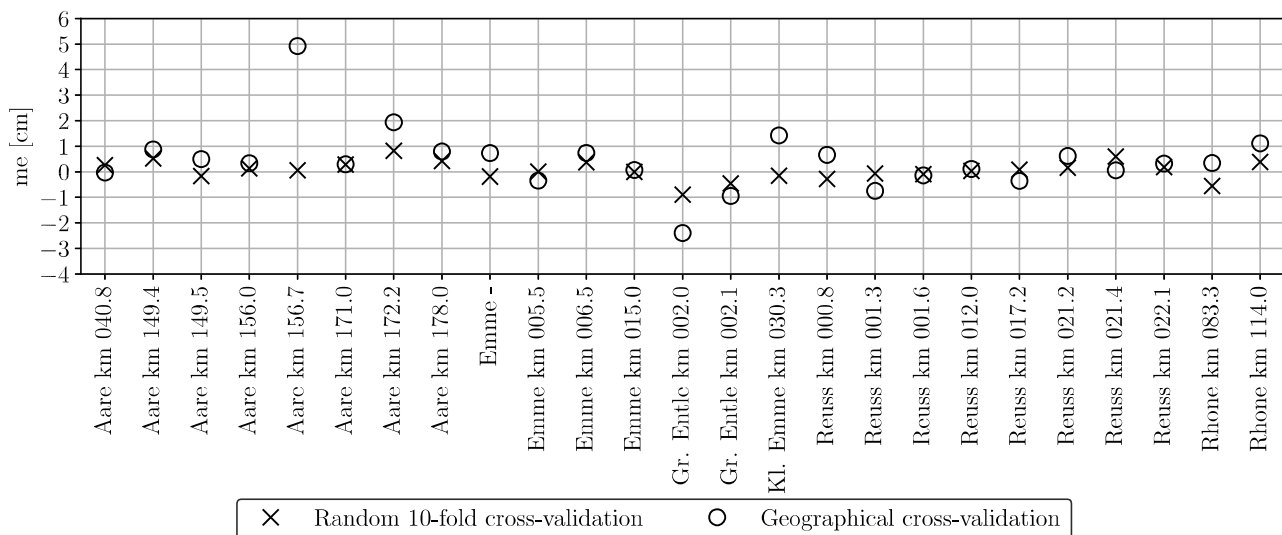

**Figure D1.** Mean error (bias) of the *GRAINet* end-to-end  $d_m$  regression per gravel bar (random – and geographical cross-validation).. A positive error implies that the *GRAINet* prediction was higher than the ground truth.

Appendix E: Resolution study

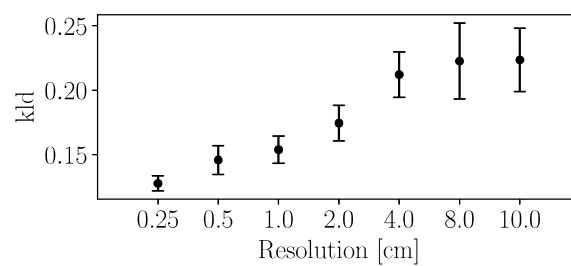

**Figure E1.** Resolution study for *GRAINet* regressing the relative frequency distribution by optimizing the KLD loss.

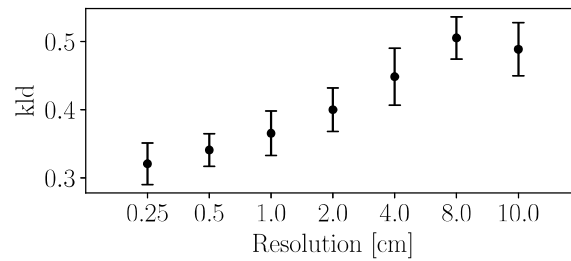

**Figure E2.** Resolution study for *GRAINet* regressing the relative *volume* distribution by optimizing the KLD loss.

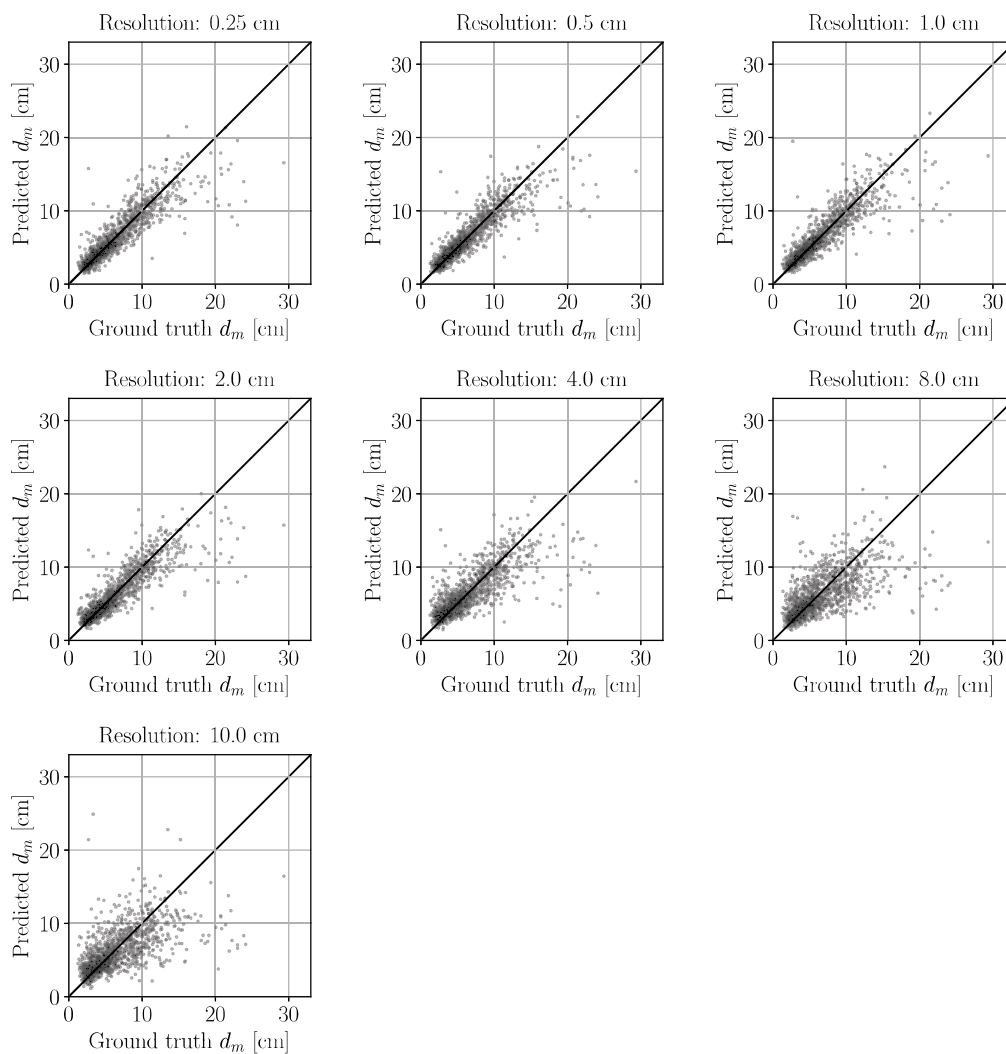

**Figure E3.** Scatter plots of *GRAINet*  $d_m$  regression with different image resolutions (trained with MSE loss).



*Author contributions.* NL and AR developed the code and carried out the experiments. AI designed the data acquisition and analyzed the results. KS, JW and RH provided guidance during project planning and experimentation. All authors contributed to the manuscript, under the lead of NL and AI.

565 *Competing interests.* The authors declare that they have no conflict of interest.

*Acknowledgements.* We thank Hunziker, Zarn & Partner for sharing the ground truth data for this research project.

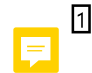





## References

- Adams, J.: Gravel size analysis from photographs, *Journal of the Hydraulics Division*, 105, 1247–1255, 1979.
- 570 Babej, J., Máčka, Z., Ondrejka, P., and Peterová, P.: Surface grain size variation within gravel bars: a case study of the River Opava, Czech Republic, 2016.
- Badoux, A., Andres, N., and Turowski, J.: Damage costs due to bedload transport processes in Switzerland, *Natural Hazards and Earth System Sciences (NHES)*, 14, 279–294, 2014.
- Black, M., Carbonneau, P., Church, M., and Warburton, J.: Mapping sub-pixel fluvial grain sizes with hyperspatial imagery, *Sedimentology*, 61, 691–711, 2014.
- 575 Brasington, J., Vericat, D., and Rychkov, I.: Modeling river bed morphology, roughness, and surface sedimentology using high resolution terrestrial laser scanning, *Water Resources Research*, 48, 2012.
- Buscombe, D.: Transferable wavelet method for grain-size distribution from images of sediment surfaces and thin sections, and other natural granular patterns, *Sedimentology*, 60, 1709–1732, 2013.
- Buscombe, D.: SediNet: A configurable deep learning model for mixed qualitative and quantitative optical granulometry, *Earth Surface Processes and Landforms*, 2019.
- 580 Buscombe, D. and Masselink, G.: Grain-size information from the statistical properties of digital images of sediment, *Sedimentology*, 56, 421–438, 2009.
- Buscombe, D., Rubin, D., and Warrick, J.: A universal approximation of grain size from images of noncohesive sediment, *Journal of Geophysical Research: Earth Surface*, 115, 2010.
- 585 Butler, J. B., Lane, S. N., and Chandler, J. H.: Automated extraction of grain-size data from gravel surfaces using digital image processing, *Journal of Hydraulic Research*, 39, 519–529, 2001.
- Carbonneau, P., Bizzi, S., and Marchetti, G.: Robotic photosieving from low-cost multirotor sUAS: a proof-of-concept, *Earth Surface Processes and Landforms*, 43, 1160–1166, 2018.
- Carbonneau, P. E.: The threshold effect of image resolution on image-based automated grain size mapping in fluvial environments, *Earth Surface Processes and Landforms*, 30, 1687–1693, 2005.
- 590 Carbonneau, P. E., Lane, S. N., and Bergeron, N. E.: Catchment-scale mapping of surface grain size in gravel bed rivers using airborne digital imagery, *Water resources research*, 40, 2004.
- Carbonneau, P. E., Bergeron, N., and Lane, S. N.: Automated grain size measurements from airborne remote sensing for long profile measurements of fluvial grain sizes, *Water Resources Research*, 41, 2005.
- 595 Detert, M. and Weitbrecht, V.: Automatic object detection to analyze the geometry of gravel grains - A free stand-alone tool, *River Flow 2012 - Proceedings of the International Conference on Fluvial Hydraulics*, 1, 595–600, 2012.
- Fehr, R.: Einfache Bestimmung der Korngrößenverteilung von Geschiebematerial mit Hilfe der Linienzahlanalyse [Simple detection of grain size distribution of sediment material using line-count analysis], *Schweizer Ingenieur und Architekt*, 105(38), 1104–1109, in German, 1987.
- 600 Graham, D. J., Reid, I., and Rice, S. P.: Automated sizing of coarse-grained sediments: image-processing procedures, *Mathematical Geology*, 37, 1–28, 2005.
- Graham, D. J., Rollet, A.-J., Piégay, H., and Rice, S. P.: Maximizing the accuracy of image-based surface sediment sampling techniques, *Water Resources Research*, 46, 2010.





- Gregory, K. J.: Human influence on the morphological adjustment of river channels: The evolution of pertinent concepts in river science, *River Research and Applications*, 35, 1097–1106, 2019.
- Habersack, H., Hengl, M., Huber, B., Lalk, P., Trithart, M., et al.: Fließgewässermodellierung–Arbeitsbehelf Feststofftransport und Gewässermorphologie [River modelling–working aid for sediment transport and fluvial morphology], Austrian Federal Ministry of Agriculture, Forestry, Environment and Water Management and Österreichischer Wasser-und Abfallwirtschaftsverband ÖWAV, Vienna, 2011.
- He, K., Zhang, X., Ren, S., and Sun, J.: Deep residual learning for image recognition, in: Proceedings of the IEEE conference on computer vision and pattern recognition, pp. 770–778, 2016.
- He, K., Gkioxari, G., Dollár, P., and Girshick, R.: Mask r-cnn, in: Proceedings of the IEEE international conference on computer vision, pp. 2961–2969, 2017.
- Huang, G.-H., Atkinson, P. M., and Wang, C.-K.: Quantifying the scales of spatial variation in gravel beds using terrestrial and airborne laser scanning data, *Open Geosciences*, 10, 607–617, 2018.
- Ibbeken, H. and Schleyer, R.: Photo-sieving: A method for grain-size analysis of coarse-grained, unconsolidated bedding surfaces, *Earth Surface Processes and Landforms*, 11, 59–77, 1986.
- Ioffe, S. and Szegedy, C.: Batch normalization: Accelerating deep network training by reducing internal covariate shift, arXiv preprint arXiv:1502.03167, 2015.
- Kingma, D. P. and Ba, J.: Adam: A method for stochastic optimization, arXiv preprint arXiv:1412.6980, 2014.
- Krumbein, W. C., Pettijohn, F. J., et al.: Manual of sedimentary petrography, 1938.
- LeCun, Y. A., Bottou, L., Orr, G. B., and Müller, K.-R.: Efficient backprop, in: Neural networks: Tricks of the trade, pp. 9–48, Springer, 2012.
- Meyer-Peter, E. and Müller, R.: Formulas for bed-load transport, in: IAHSR 2nd meeting, Stockholm, appendix 2, IAHR, 1948.
- Nelson, J. M., McDonald, R. R., Shimizu, Y., Kimura, I., Nabi, M., and Asahi, K.: Modelling flow, sediment transport and morphodynamics in rivers, *Tools in fluvial geomorphology*, pp. 412–441, 2016.
- Piégay, H., Arnaud, F., Belletti, B., Bertrand, M., Bizzi, S., Carbonneau, P., Dufour, S., Liebault, F., Ruiz-Villanueva, V., and Slater, L.: Remotely Sensed Rivers in the Anthropocene: State of the Art and Prospects, *Earth Surface Processes and Landforms*, 2019.
- Poepl, R. E., Keesstra, S. D., and Maroulis, J.: A conceptual connectivity framework for understanding geomorphic change in human-impacted fluvial systems, *Geomorphology*, 277, 237–250, 2017.
- Ramdas, A., Trillos, N. G., and Cuturi, M.: On wasserstein two-sample testing and related families of nonparametric tests, *Entropy*, 19, 47, 2017.
- Rubin, D. M.: A simple autocorrelation algorithm for determining grain size from digital images of sediment, *Journal of Sedimentary Research*, 74, 160–165, 2004.
- Settles, B.: Active learning literature survey, Tech. rep., University of Wisconsin-Madison Department of Computer Sciences, 2009.
- Sharma, K., Gold, M., Zurbrugg, C., Leal-Taixé, L., and Wegner, J. D.: HistoNet: Predicting size histograms of object instances, in: The IEEE Winter Conference on Applications of Computer Vision, pp. 3637–3645, 2020.
- Shen, C., Laloy, E., Elshorbagy, A., Albert, A., Bales, J., Chang, F.-J., Ganguly, S., Hsu, K.-L., Kifer, D., Fang, Z., Fang, K., Li, D., Li, X., and Tsai, W.-P.: HESS Opinions: Incubating deep-learning-powered hydrologic science advances as a community, *Hydrology and Earth System Sciences*, 22, 5639–5656, <https://doi.org/10.5194/hess-22-5639-2018>, <https://www.hydrol-earth-syst-sci.net/22/5639/2018/>, 2018.



- Sime, L. and Ferguson, R.: Information on grain sizes in gravel-bed rivers by automated image analysis, *Journal of Sedimentary Research*, 73, 630–636, 2003.
- Simon, A. and Rinaldi, M.: Disturbance, stream incision, and channel evolution: The roles of excess transport capacity and boundary materials in controlling channel response, *Geomorphology*, 79, 361–383, 2006.
- 645 Spada, D., Molinari, P., Bertoldi, W., Vitti, A., and Zolezzi, G.: Multi-Temporal Image Analysis for Fluvial Morphological Characterization with Application to Albanian Rivers, *ISPRS International Journal of Geo-Information*, 7, 314, 2018.
- Surian, N.: Downstream variation in grain size along an Alpine river: analysis of controls and processes, *Geomorphology*, 43, 137–149, 2002.
- Surian, N. and Rinaldi, M.: Morphological response to river engineering and management in alluvial channels in Italy, *Geomorphology*, 50, 307–326, 2003.
- 650 Van Horn, G., Branson, S., Farrell, R., Haber, S., Barry, J., Ipeirotis, P., Perona, P., and Belongie, S.: Building a bird recognition app and large scale dataset with citizen scientists: The fine print in fine-grained dataset collection, in: *Proceedings of the IEEE Conference on Computer Vision and Pattern Recognition*, pp. 595–604, 2015.
- Vázquez-Tarrío, D., Borgniet, L., Liébault, F., and Recking, A.: Using UAS optical imagery and SfM photogrammetry to characterize the surface grain size of gravel bars in a braided river (Vénéon River, French Alps), *Geomorphology*, 285, 94–105, 2017.
- 655 Verdú, J. M., Batalla, R. J., and Martínez-Casasnovas, J. A.: High-resolution grain-size characterisation of gravel bars using imagery analysis and geo-statistics, *Geomorphology*, 72, 73–93, 2005.
- Wolman, M. G.: A method of sampling coarse river-bed material, *EOS, Transactions American Geophysical Union*, 35, 951–956, 1954.
- Wu, F.-C., Wang, C.-K., and Huang, G.-H.: Delineation of gravel-bed clusters via factorial kriging, *Geomorphology*, 308, 161–174, 2018.
- Zettler-Mann, A. and Fonstad, M.: Riverscape mapping and hyperscale analysis of the sediment links concept, *Geomorphology*, 350, 106 920, 660 2020.
